# Supplementary material for: Public perspectives and media reporting of wolf reintroduction in Colorado
Source: PeerJ. 2020 May 7;8:e9074. doi: 10.7717/peerj.9074 (PMC7224228; doi:10.7717/peerj.9074)
Supplement: Supplemental Information 1 [file peerj-08-9074-s001.csv]

participantID	impactExtent	impactsNegative	impactsPositive	mgmtLimitDeerElk	mgmtLethalRemoval	mgmtCompLivestock	mgmtCompLivestockLicense	mgmtCompLivestockTax	mgmtRecHunt	votingIntention	identifyWildAdv	identifyAnimRightsAdv	identifyGunRightsAdv	identifyPropRightsAdv	identifyHunter	identifyRancher	identifyConserv	gender	nChildren	pets	petsOther	income	education	commSize	age	ageGroup	region	weight
1	4			5	6	5	5	4	5	1	2	2	1	2	1	1	2	2	0	4		4	4	5	71	55+	Western Slope	0.37
2	4			3	5	7	7	7	3	1	4	3	3	3	2	3	3	2	0	1,2,3	Rabbits, ferrets, livestock	3	4	8	50	35-54	Western Slope	0.37
3	4			6	7	7	7	1	6	1	3	1	3	3	1	1	3	1	0	1		5	5	5	67	55+	Western Slope	0.37
4	4			5	5	7	7	7	6	1	2	1	1	2	1	1	2	1	0	2		4	5	5	69	55+	Western Slope	0.37
5	4			5	6	5	6	4	5	0	2	2	3	3	1	1	1	2	2	1		4	3	7	30	18-34	Western Slope	0.37
6	4			7	7	7	7	7	7	0	1	1	3	1	1	3	4	2	0	4		3	2	8	68	55+	Western Slope	0.37
7	7		Knowing that a species that was here before has returned would give me a great sense of satisfaction. It would be a small step to returning the earth too how it used to be. I would be excited to be in an area where I could hear and possibly see wolves is thrilling. I have seen them in the tetons and it is a very wonderful experience.	6	7	5	7	7	5	1	4	4	4	2	1	1	4	2	0	4		4	3	5	65	55+	Western Slope	0.37
8	2	I would be afraid to walk around outside. I would be afraid wolves would get into trash cans, backyards, public areas. I would be afraid a wolf would bite or attack me.		5	1	7	7	7	1	1	1	1	1	1	1	1	1	2	0	1		2	4	7	52	35-54	Western Slope	0.37
9	4			6	6	6	5	2	7	1	4	2	1	2	1	1	4	1	0	1,2		4	4	7	70	55+	Western Slope	0.37
10	4			7	7	6	3	2	1	1	1	1	1	1	1	1	1	2	2	2		4	2	7	29	18-34	Western Slope	0.37
11	4			5	5	5	5	2	5	1	3	2	4	4	4	2	3	1	2	4		2	3	7	57	55+	Eastern Plains	0.26
12	1	Attacks on livestock		4	3	4	5	4	3	0	1	2	3	4	1	2	3	1	0	1		4	4	5	63	55+	Western Slope	0.37
13	4			5	3	3	5	1	2	1	3	2	1	2	4	3	1	1	0	2		3	3	1	59	55+	Western Slope	0.37
14	4			5	5	5	6	6	4	1	1	1	1	1	1	1	1	2	1	1,2,3	Fish	5	5	2	55	55+	Western Slope	0.37
15	4			5	3	4	5	5	5	1	3	4	2	3	2	2	2	1	0	1		5	3	6	75	55+	Western Slope	0.37
16	4			4	4	4	4	4	4	0	1	1	3	2	3	2	2	1	0	1		4	4	8	73	55+	Western Slope	0.37
17	4			5	5	4	4	4	5	1	1	1	1	1	1	1	1	2	0	4		3	4	7	65	55+	Western Slope	0.37
18	3	As tehy get established they will multiply and move into residential areas, just as bears, mountain lions, etc., have done.		7	7	7	1	7	3	0	2	1	3	4	3	1	2	1	0	1,2,3	lizards, tortoise	5	5	6	69	55+	Eastern Plains	0.26
19	4			5	7	7	6	6	5	1	2	2	3	4	3	3	3	2	0	1,3	Turtle	3	3	8	51	35-54	Western Slope	0.37
20	4			7	5	4	5	3	6	1	2	3	4	4	2	2	2	1	0	4		5	4	6	74	55+	Western Slope	0.37
21	4			3	1	3	4	4	2	1	1	1	1	1	1	1	1	2	0	1,2		3	5	6	69	55+	Eastern Plains	0.26
22	3	Hunting is one of my major activities and I believe wolves would reduce available game.		7	7	7	1	7	7	0	3	1	4	4	4	4	3	1	0	4		4	5	8	73	55+	Western Slope	0.37
23	4			5	4	5	6	6	5	1	2	2	4	3	1	1	2	2	2	1		3	2	3	33	18-34	Western Slope	0.37
24	4			4	7	3	5	4	4	1	1	1	3	4	1	1	1	1	3	1,2,3	Rabbits	4	2	7	37	35-54	Eastern Plains	0.26
25	4			4	4	4	3	6	5	1	2	2	2	2	1	1	1	2	0	1,2		3	3	7	25	18-34	Eastern Plains	0.26
26	5		Lets more life back in the wilderness that man took away .	4	6	5	2	2	4	1	1	1	1	1	1	1	1	1	0	1,3	Bird	1	2	8	52	35-54	Western Slope	0.37
27	2	Farms would be effected which is close to my family. Could kill all my dogs		5	4	4	1	1	5	0	4	4	4	4	4	4	3	2	0	1		2	3	2	20	18-34	Western Slope	0.37
28	3	Some people would like to domesticate them which could pose a problem. Also, what impact would that have with all the homeless people we have in CO.		5	5	5	5	4	1	1	1	1	1	2	1	1	2	2	0	1,2,3	Birds, Chinchilla	5	4	4	44	35-54	Western Slope	0.37
29	5		Balance	5	6	6	6	6	2	1	3	4	4	4	1	1	1	2	2	1,2		3	2	6	39	35-54	Western Slope	0.37
30	4			4	4	4	4	4	4	1	2	2	2	2	2	2	2	2	0	3	Fish	1	2	5	19	18-34	Eastern Plains	0.26
31	4			4	4	4	4	4	4	1	1	1	1	1	1	1	1	2	0	1		3	4	4	59	55+	Western Slope	0.37
32	3	Possible impact on pet and human safety.		6	6	1	3	1	7	1	2	1	2	2	1	1	1	1	0	1		4	3	7	72	55+	Western Slope	0.37
33	4			7	7	4	4	4	7	0	2	2	4	4	2	2	3	2	0	4		3	2	8	76	55+	Western Slope	0.37
34	3	I have 2 dogs that I walk every day near a Colorado Wildlife Area. I‚Äôm extremely concerned about coyotes, snakes, & mountain lions. Adding wolves to that population doesn‚Äôt thrill me. I might be okay with it if you‚Äôd stop hunters from hunting. I‚Äôm just surprised by the fact that I don‚Äôt see any wildlife in Colorado and yet wildlife is bountiful in the Pacific NW.		7	4	7	4	1	4	0	3	3	1	3	1	2	3	2	0	1		4	5	3	57	55+	Western Slope	0.37
35	4			5	5	5	6	6	6	1	2	3	3	3	3	3	2	1	0	1		3	3	6	64	55+	Western Slope	0.37
36	2	i choose the wrong one the would cause trouble i live in rural area and if those fucking wolves come on my property i will shoot them dead!!!!		5	7	7	7	7	7	0	1	1	1	1	1	1	1	2	0	1,2,3	fish	2	2	8	50	35-54	Western Slope	0.37
37	7		I‚Äôve been a lover of wolves my whole life and would love the chance to observe them in person	7	7	5	5	4	1	1	4	4	3	3	2	3	3	2	1	1,2,3	Birds	2	2	3	39	35-54	Western Slope	0.37
38	4			7	7	7	7	7	7	0	3	1	4	4	3	4	4	2	0	4		3	4	5	69	55+	Western Slope	0.37
39	5		we would seldom see sick or dead animals that are the wolves prey out in nature	6	4	3	3	3	4	1	2	2	1	2	1	1	2	1	2	4		5	4	5	73	55+	Western Slope	0.37
40	4			5	4	5	6	4	4	1	2	2	1	2	1	1	2	1	0	2		3	3	6	66	55+	Western Slope	0.37
41	4			7	4	4	4	4	1	0	1	1	1	1	1	1	1	2	0	1		5	4	5	60	55+	Eastern Plains	0.26
42	7		Wolves would rebalance the ecosystem and improve the state of Colorado. This becomes a Win Win for everyone in the state. The humans Win, The animals Win and the Environment Wins	5	2	5	5	3	5	1	3	3	4	3	3	3	3	1	0	4		1	3	3	67	55+	Western Slope	0.37
43	4			7	6	7	6	7	6	1	3	3	1	3	2	3	4	1	0	1		2	2	5	68	55+	Western Slope	0.37
44	3	They hunt and kill		5	6	6	6	6	4	0	1	1	1	1	1	2	1	2	2	3	Fish	4	2	6	43	35-54	Western Slope	0.37
45	6		A healthy wildlife is part of a healthy environment	5	5	5	5	5	4	1	4	4	3	4	2	3	4	1	0	1		2	2	8	68	55+	Western Slope	0.37
46	3	me and my father like to hunt deer and elk, and I believe the elk and deer population would decrease or relocate		5	6	6	1	4	4	0	1	1	3	3	3	1	1	2	0	2		3	4	1	28	18-34	Western Slope	0.37
47	5		Bring nature back to where it was	5	1	5	5	5	5	1	1	1	1	1	1	1	1	2	3	1		4	5	1	43	35-54	Front Range	1.66
48	4			1	1	7	7	7	1	1	4	4	4	4	1	1	3	2	2	4		2	4	2	35	35-54	Front Range	1.66
49	4			4	6	7	6	6	3	1	1	1	2	2	1	1	1	2	0	1,3	Fish	4	5	1	24	18-34	Front Range	1.66
50	7		They would help keep the ecosystem healthy.	5	2	4	6	6	1	1	1	1	1	1	1	1	1	2	0	4		2	2	1	21	18-34	Front Range	1.66
51	7		Because my child would grow up knowing wolves existed.	2	5	7	5	6	1	1	3	3	4	4	4	4	4	2	1	4		1	3	2	29	18-34	Front Range	1.66
52	4			1	3	7	7	7	1	1	3	4	1	1	1	1	3	2	0	1,2		4	5	2	37	35-54	Front Range	1.66
53	6		Because it would reduce the rodent population	5	5	4	4	4	4	1	3	2	3	1	1	1	1	2	2	1,3	Snake	4	3	5	29	18-34	Front Range	1.66
54	7		I feel that we are taking all the animals homes because of all the construction etc. I would like to see us give back some to the animals that were there before us	5	4	3	5	3	1	1	4	4	1	2	1	2	3	2	2	2		3	3	8	59	55+	Front Range	1.66
55	4			3	5	3	5	5	3	1	2	2	2	3	3	2	2	2	5	4		4	3	5	36	35-54	Front Range	1.66
56	5		It would be cool to maybe see one in the wild	5	4	4	3	2	3	1	4	4	1	3	1	1	4	2	2	1		4	5	1	36	35-54	Front Range	1.66
57	5		I think knowing that they are back in Colorado allows the ecosystem to go back to normal.	4	3	5	6	4	2	1	3	2	1	1	2	1	3	2	0	1,2		4	5	1	26	18-34	Front Range	1.66
58	4			5	4	5	4	1	2	1	3	1	1	2	2	2	1	2	1	1		3	2	3	21	18-34	Front Range	1.66
59	5		I believe they would positively impact my quality of life because I would take more outdoors trips in hopes of seeing them in the wild	4	1	2	1	1	1	1	3	2	3	4	2	1	2	2	0	1		3	2	8	28	18-34	Front Range	1.66
60	6		https://www.swagbucks.com/watch/video/307241724/Alina-Petra-Has-Very-Skimpy-Bikinis	5	5	5	4	4	4	1	2	3	3	3	3	3	3	1	0	2		1	2	1	30	18-34	Western Slope	0.37
61	2	Knowing these animals that attack and kill for pleasure and not for surviving would be out in the woods would severely hinder my outdoors lifestyle. Definitely more likely to start carrying more defensive methods.		7	7	7	2	2	7	0	3	3	3	4	3	4	3	2	0	4		4	4	3	32	18-34	Front Range	1.66
62	4			5	3	1	5	2	5	1	3	4	3	3	1	1	2	2	0	4		2	3	2	23	18-34	Front Range	1.66
63	5		Nice to see a healthy population.. good for environment	4	4	4	5	3	3	1	1	1	1	1	1	1	1	2	2	1		5	4	3	48	35-54	Front Range	1.66
64	2	If they were released into the wild and made their way down to towns it could be dangerous to people		4	4	6	3	5	1	1	1	3	3	1	1	1	1	1	3	1		3	2	5	32	18-34	Front Range	1.66
65	5		It would be cool to be in a state that supports their reintroduction and I would look forward to trying to see some in the wild.	4	5	5	5	4	4	1	3	3	1	1	1	1	3	2	0	1		5	5	1	40	35-54	Front Range	1.66
66	4			3	2	4	5	5	3	0	1	1	1	1	1	1	1	2	0	1,2		5	4	3	52	35-54	Front Range	1.66
67	6		If we reintroduce wolves that would be a positive thing because then wolves can live happy and we wouldn‚Äôt be the cause of their down fall anymore.	4	3	6	5	4	4	1	3	3	1	2	1	2	4	2	0	1		4	2	3	20	18-34	Front Range	1.66
68	3	There would be a higher likelihood of wolf attacks		5	5	5	4	5	2	0	1	1	1	1	1	1	1	2	0	4		4	4	1	23	18-34	Front Range	1.66
69	4			3	3	2	2	2	1	1	3	2	2	1	2	1	1	2	0	2		4	4	1	42	35-54	Front Range	1.66
70	3	People are leaving their homes here for fear and people's faith is slowly eroding here.		5	6	6	4	5	6	0	3	2	4	3	3	2	2	1	2	1,2,3	Fish	4	5	4	50	35-54	Front Range	1.66
71	5		Seeing them grow in the wild vs in zoos and sanctuaries	5	4	5	5	5	1	1	3	3	2	2	1	1	2	2	0	1		4	4	5	46	35-54	Front Range	1.66
72	6		I would want to go outdoors and wanting to go looking for wolves just to see them close enough where i dont get attacked by them.	5	4	1	1	1	1	1	2	3	1	1	1	1	1	2	1	1		3	2	2	21	18-34	Front Range	1.66
73	5		They are majestic animals that would bring more tourism to Colorado.	5	3	6	3	1	1	1	3	4	1	2	1	1	2	2	0	1,2		3	4	1	34	35-54	Front Range	1.66
74	5		Very good for the environment	4	2	3	3	2	3	1	2	2	3	3	2	1	2	1	0	1,2		4	2	1	37	35-54	Front Range	1.66
75	4			5	5	4	4	4	1	1	1	1	1	1	1	1	1	2	0	1,2		3	3	4	53	35-54	Western Slope	0.37
76	4			5	6	5	5	3	5	1	2	1	1	1	1	1	1	2	0	1		5	5	3	53	35-54	Western Slope	0.37
77	4			5	4	3	3	3	2	1	2	1	4	3	2	1	2	2	3	1,2		4	4	1	27	18-34	Front Range	1.66
78	4			3	1	5	3	3	3	1	1	1	1	1	1	1	1	2	0	4		5	4	3	37	35-54	Front Range	1.66
79	4			5	5	5	5	4	5	0	2	2	1	1	1	1	2	2	3	2,3	cockateil	4	4	6	46	35-54	Front Range	1.66
80	4			4	1	5	3	7	2	1	4	4	2	2	1	1	4	1	0	1		4	4	2	37	35-54	Front Range	1.66
81	4			5	5	5	5	5	5	1	2	1	1	2	1	1	2	2	2	1		5	4	1	38	35-54	Front Range	1.66
82	4			5	3	6	5	3	4	1	2	2	1	2	1	1	2	2	2	1		5	5	1	40	35-54	Front Range	1.66
83	4			4	4	4	4	4	4	1	2	3	1	2	1	1	2	2	0	1		6	5	1	39	35-54	Front Range	1.66
84	4			6	5	4	4	3	2	0	1	1	2	2	1	1	1	2	1	1		4	4	2	48	35-54	Front Range	1.66
85	4			5	5	5	1	2	4	1	1	3	2	2	3	2	3	2	0	1,2		3	2	2	26	18-34	Front Range	1.66
86	5		Improvements in the ecosystem benefit us all	4	3	5	5	5	1	1	2	3	4	3	3	3	4	2	0	1,2		4	2	1	30	18-34	Front Range	1.66
87	4			6	6	5	6	2	6	1	2	1	4	4	4	4	2	2	2	1		4	2	6	31	18-34	Front Range	1.66
88	4			4	5	6	7	7	6	1	2	3	3	3	1	1	2	2	0	1		4	4	4	24	18-34	Front Range	1.66
89	4			4	5	5	5	5	5	1	2	2	1	2	1	1	1	1	0	4		2	3	1	41	35-54	Front Range	1.66
90	6		Not sure	4	1	7	7	7	1	1	2	3	3	1	1	1	1	1	0	4		4	2	2	31	18-34	Front Range	1.66
91	4			5	7	5	7	1	6	1	3	4	3	3	1	1	2	1	0	1,3	Guinea pigs	4	4	1	50	35-54	Front Range	1.66
92	2	Nothing much		3	4	4	5	5	5	1	3	3	3	3	3	2	3	1	0	4		3	2	3	35	35-54	Front Range	1.66
93	7		Because i dont want to get attacked by wolves	1	7	1	1	1	1	0	1	1	1	1	1	1	1	2	10	4		1	1	2	21	18-34	Front Range	1.66
94	4			5	5	5	5	3	2	1	3	3	1	1	2	2	2	2	1	1		4	2	2	36	35-54	Front Range	1.66
95	4			5	4	4	4	4	4	1	1	3	3	1	1	1	1	2	4	1,2		2	2	5	33	18-34	Front Range	1.66
96	6		They are a valuable part of the ecosystem.	4	3	4	4	4	2	1	3	3	3	2	3	2	3	2	4	1,2		4	3	1	32	18-34	Front Range	1.66
97	4			2	2	2	2	2	2	1	4	4	3	3	1	1	3	2	0	1		2	3	8	44	35-54	Western Slope	0.37
98	6		I think wolves could positively impact the livelihood and quality of my life because it could inspire my to be out in nature more. I love animals, and knowing they are in Colorado may inspire me to go out and possibly see one, while keeping a safe distance of course.	4	2	7	7	7	1	1	3	2	1	1	1	3	1	2	0	1,2		3	2	1	24	18-34	Front Range	1.66
99	4			2	1	4	5	5	1	1	4	4	1	2	1	1	4	2	0	2		3	3	1	50	35-54	Front Range	1.66
100	2	The safety of everyone outside		3	5	3	1	6	3	0	1	1	1	1	1	1	1	2	2	4		2	2	2	25	18-34	Front Range	1.66
101	4			4	4	4	4	4	4	1	2	4	1	3	2	1	4	1	0	1		6	4	1	39	35-54	Front Range	1.66
102	4			5	3	7	6	3	3	1	2	3	1	1	1	1	3	2	2	1,2,3		3	4	2	39	35-54	Front Range	1.66
103	7		Naturally reduce the populations animals that are considered nuisances. They would help our ecosystem greatly	5	4	5	6	6	5	1	2	2	4	4	4	4	3	2	2	1		4	3	3	33	18-34	Western Slope	0.37
104	4			5	3	5	5	5	5	1	2	1	1	1	1	1	2	2	2	4		4	4	2	34	35-54	Front Range	1.66
105	3	Thank ya		3	3	2	3	4	5	1	3	3	2	3	3	4	2	1	2	4		5	5	2	55	55+	Front Range	1.66
106	7		They're dangerous to society.	6	5	5	6	6	6	1	4	4	4	4	4	4	4	1	2	1,2		4	5	1	35	35-54	Front Range	1.66
107	3	The possibility of them entering public or residential areas		4	4	5	4	3	4	0	2	4	1	3	1	1	3	1	2	2		3	2	1	18	18-34	Front Range	1.66
108	3	I don‚Äôt know		3	5	2	2	4	7	1	1	1	1	1	1	1	1	2	0	1		4	3	2	42	35-54	Front Range	1.66
109	4			3	2	3	6	3	1	1	3	2	1	1	1	1	2	1	0	2		3	4	1	29	18-34	Front Range	1.66
110	7		They are amazing creatures	6	2	1	1	1	1	1	3	3	3	4	3	4	3	2	0	2		4	2	1	20	18-34	Front Range	1.66
111	4			4	4	4	4	4	4	1	2	2	3	3	1	1	2	2	2	1,2		5	4	1	36	35-54	Front Range	1.66
112	5		Because they have a quality of life	3	1	4	5	5	5	1	3	4	3	4	2	4	3	2	2	1		2	3	1	21	18-34	Front Range	1.66
113	4			4	5	4	4	5	1	1	2	2	1	1	1	1	1	2	2	1		4	4	8	41	35-54	Western Slope	0.37
114	4			7	6	7	6	5	7	1	1	1	1	2	1	1	2	2	2	4		5	2	2	54	35-54	Front Range	1.66
115	6		I think wolves are beautiful animals and it's always wonderful to have more wildlife around you.	3	2	5	2	3	1	1	3	3	1	1	1	1	3	2	0	1		1	2	3	21	18-34	Front Range	1.66
116	5		Cause they were here before me	5	3	3	3	3	5	1	2	1	1	1	2	2	3	1	3	2		3	3	2	37	35-54	Front Range	1.66
117	5		I would go more places in the Colorado outdoors to try and see them	7	2	7	7	7	2	1	1	1	1	1	1	1	1	2	0	1,2,3	Horses	3	3	4	40	35-54	Front Range	1.66
118	4			6	4	5	5	4	4	1	3	3	1	2	2	2	3	1	0	4		4	4	1	34	35-54	Front Range	1.66
119	5		Restore balance to ecosystem	6	5	6	7	7	5	1	3	3	1	1	1	1	3	2	0	1		4	2	1	19	18-34	Front Range	1.66
120	4			4	4	5	5	5	1	1	2	3	3	3	1	1	3	1	0	4		2	4	2	67	55+	Front Range	1.66
121	4			6	4	5	5	4	2	1	3	3	3	1	1	1	2	2	2	1		4	5	2	44	35-54	Front Range	1.66
122	4			6	7	7	6	5	7	1	1	2	1	1	1	1	2	1	0	4		6	5	7	75	55+	Western Slope	0.37
123	4			4	5	5	5	4	3	1	3	3	3	1	1	1	2	2	0	2		3	4	2	28	18-34	Front Range	1.66
124	4			4	3	5	5	4	5	1	3	2	1	2	1	1	3	1	0	1		4	4	2	67	55+	Front Range	1.66
125	4			2	6	6	5	5	1	1	2	2	1	2	1	1	2	1	0	1		4	4	3	68	55+	Front Range	1.66
126	4			2	2	7	6	5	1	1	2	3	1	1	1	1	2	2	0	1,2		4	4	1	35	35-54	Front Range	1.66
127	2	I thought I marked positive		5	3	4	7	3	1	1	2	4	2	1	1	1	1	2	0	4		4	4	2	52	35-54	Front Range	1.66
128	4			5	5	6	5	4	5	1	4	4	1	2	1	1	3	1	0	1,2,3	rabbits, fish	3	3	4	54	35-54	Front Range	1.66
129	4			6	6	4	5	4	5	1	3	2	2	3	1	1	3	1	0	4		5	5	1	64	55+	Front Range	1.66
130	4			7	7	1	1	1	5	0	2	2	3	4	1	1	1	2	0	4		2	4	1	71	55+	Front Range	1.66
131	5		I dot. Mind if they‚Äôre there or not	4	4	4	2	3	4	1	1	1	2	1	1	1	1	2	0	1		5	5	2	28	18-34	Front Range	1.66
132	1	We kill them because ofgas		1	1	1	1	2	2	1	1	2	3	4	3	2	1	1	0	4		1	4	1	20	18-34	Front Range	1.66
133	4			4	4	4	4	4	4	1	1	1	1	1	1	1	1	1	1	4		2	2	1	67	55+	Front Range	1.66
134	6		Because it's a fact of nature and their beauty and raw nature will improve colorado.	4	1	1	1	1	1	1	3	3	4	3	3	3	3	2	3	1		4	4	2	32	18-34	Front Range	1.66
135	4			7	7	6	6	6	7	0	4	4	4	4	3	3	4	1	0	2		4	2	6	70	55+	Western Slope	0.37
136	4			5	6	6	4	5	3	1	3	4	3	4	3	4	3	2	0	4		4	3	1	71	55+	Front Range	1.66
137	4			5	5	3	6	6	5	1	2	2	3	3	2	3	3	1	0	2		4	5	2	82	55+	Front Range	1.66
138	4			6	5	2	2	2	6	1	3	3	2	3	1	1	2	2	3	1,3		3	3	2	61	55+	Front Range	1.66
139	4			5	5	5	1	1	1	0	1	1	1	3	1	1	1	1	2	4		1	4	7	67	55+	Front Range	1.66
140	5		Reducing the population of sick elk and deer would improve the herd health of those populations which would provide more opportunities to see them in a healthy environment. It would also reduce the over grazing of some tree species and improve the overall health of the environment, just as it did in Yellowstone. When the environment is healthy, we are all positively impacted even though it may be…	2	1	7	7	6	2	1	4	2	1	1	1	1	4	1	0	4		4	2	4	73	55+	Front Range	1.66
141	4			4	5	5	5	5	4	1	2	4	2	3	1	1	1	2	0	1		4	4	3	75	55+	Front Range	1.66
142	7		Positively	1	7	7	7	7	7	0	4	4	4	4	4	4	4	2	2	2		3	4	1	51	35-54	Front Range	1.66
143	4			5	3	5	5	3	6	1	3	4	2	3	3	3	3	1	0	1		4	2	2	64	55+	Front Range	1.66
144	1	i am afriad of any animals and do not like animals		4	4	4	1	1	1	0	1	1	1	1	1	1	1	2	0	4		3	4	1	60	55+	Front Range	1.66
145	4			4	4	4	4	4	4	0	2	1	4	3	1	1	1	2	2	4		4	5	1	65	55+	Front Range	1.66
146	4			7	7	7	7	7	1	1	4	4	1	2	1	1	4	2	1	1		3	4	6	29	18-34	Front Range	1.66
147	4			7	6	4	5	5	4	1	2	4	3	3	2	2	2	1	0	2		3	4	1	44	35-54	Front Range	1.66
148	4			7	6	7	3	5	7	1	3	2	4	4	3	4	2	1	0	1		3	3	2	72	55+	Front Range	1.66
149	4			5	5	2	5	2	1	1	2	2	1	2	1	1	2	1	2	1		5	4	1	50	35-54	Front Range	1.66
150	5		i am not sure	6	5	7	7	7	4	1	1	1	1	1	1	1	1	2	0	1,2		5	3	1	24	18-34	Front Range	1.66
151	7		Wolf reintroduction would change the ecosystems in Colorado for the better	1	1	5	5	5	3	1	2	1	1	2	1	1	3	2	2	1		4	4	2	34	35-54	Front Range	1.66
152	4			1	1	1	1	1	3	1	1	1	3	3	1	3	1	2	1	1,2,3		2	4	8	50	35-54	Front Range	1.66
153	4			5	4	4	2	5	5	1	2	2	2	2	3	3	2	1	2	1		5	4	5	43	35-54	Front Range	1.66
154	4			6	6	7	7	5	5	1	3	4	2	3	2	2	4	1	0	1		5	4	3	71	55+	Front Range	1.66
155	4			7	7	7	7	3	7	1	4	2	1	4	2	4	4	1	0	4		4	3	8	72	55+	Eastern Plains	0.26
156	5		God put all creatures on this earth for a purpose and everything in balance. When one thing is missing out effects other things.	5	7	3	5	3	6	1	3	3	2	1	1	2	2	2	0	1		4	3	3	51	35-54	Front Range	1.66
157	4			3	3	4	5	4	1	1	2	2	1	2	1	1	2	2	0	2		3	3	5	72	55+	Front Range	1.66
158	4			1	1	4	6	1	1	1	2	2	3	4	2	2	1	1	0	2		4	3	1	69	55+	Front Range	1.66
159	7		I love animals an any chance to wildlife- AT a respected distance- is a wonderful opportunity.	1	1	4	6	4	1	1	4	4	3	3	2	2	3	2	0	1,2		3	4	1	50	35-54	Front Range	1.66
160	4			7	7	6	6	6	7	1	2	2	1	2	1	1	3	2	0	1		4	5	2	70	55+	Front Range	1.66
161	4			4	2	5	3	3	4	1	3	3	1	2	1	1	3	1	0	3	Birds	4	4	1	60	55+	Front Range	1.66
162	4			6	6	5	5	5	3	1	2	2	1	2	1	1	3	1	0	4		4	5	1	66	55+	Front Range	1.66
163	4			6	4	5	6	6	1	1	1	2	1	1	1	1	1	2	0	1		4	2	7	63	55+	Front Range	1.66
164	4			5	5	6	6	7	5	1	3	NA	3	3	2	3	4	2	1	1		4	4	1	43	35-54	Front Range	1.66
165	4			7	1	7	7	4	1	1	4	4	1	2	1	2	4	2	0	2		6	2	2	26	18-34	Front Range	1.66
166	3	There is a large human population moving to Colorado re introduction of the gray wolf at this time may not be the best idea? Gray wolves have a predisposition to hunting in packs! Which makes for a more dire situation for those camping and backpacking!		6	6	5	1	1	6	0	3	2	4	4	4	4	3	1	0	4		2	2	8	72	55+	Front Range	1.66
167	4			5	6	5	5	5	5	1	3	4	2	4	2	2	3	2	2	1		4	4	3	40	35-54	Front Range	1.66
168	3	Hunting is a big part of my family, if having wolves made it harder to get tags for hunting it might push us to move. Also if they attack family pets and livestock , it can quickly become a problem. We have alot of people that hike with their kids, myself included and I would fear to go out and a wolf attack my kid or something		7	7	7	1	6	4	0	2	2	3	3	3	1	1	2	2	1,2		3	2	1	26	18-34	Front Range	1.66
169	4			2	1	6	6	6	1	1	2	4	3	2	2	2	3	2	1	1,2		5	5	3	40	35-54	Front Range	1.66
170	4			6	6	5	5	3	4	1	3	4	1	3	3	4	4	2	3	1,2		3	3	2	65	55+	Front Range	1.66
171	6		theyd make the environment better	2	3	5	5	5	5	1	2	3	2	2	3	3	3	1	0	3	dragon	5	4	2	31	18-34	Front Range	1.66
172	1	Cause there dangerous n hurt people there just scary looking		4	4	4	4	4	4	0	1	1	1	1	1	1	1	2	4	4		2	1	6	35	35-54	Eastern Plains	0.26
173	5		The environment is good	6	5	4	4	4	5	1	3	2	2	2	2	2	2	2	1	4		4	2	2	23	18-34	Front Range	1.66
174	3	No		3	5	5	3	5	3	1	4	3	3	3	3	3	3	1	1	4		4	3	1	22	18-34	Front Range	1.66
175	4			6	7	7	7	7	4	0	3	2	4	4	4	4	4	1	0	1,2		4	3	8	69	55+	Eastern Plains	0.26
176	6		they are part of the circle of life	5	5	5	5	5	5	1	2	2	1	2	1	1	3	1	0	4		4	3	3	63	55+	Front Range	1.66
177	4			5	4	5	3	4	5	1	3	3	4	4	3	3	3	2	3	4		2	2	4	29	18-34	Front Range	1.66
178	4			6	6	6	4	4	4	1	1	1	3	4	1	1	2	1	0	1		6	5	4	69	55+	Front Range	1.66
179	4			4	4	4	4	4	4	0	1	2	1	2	1	1	2	1	0	4		3	5	3	73	55+	Front Range	1.66
180	5			4	4	4	4	4	4	1	1	1	1	1	1	1	1	1	0	1		3	3	8	38	35-54	Western Slope	0.37
181	5		Wolves would improve my quality of life by allowing nature to begin to return to its natural state thus improving the nature overall	6	6	4	6	1	6	1	4	3	1	3	2	2	3	1	0	1		5	4	5	63	55+	Western Slope	0.37
182	4			3	5	5	5	5	4	1	1	1	1	1	1	2	2	1	1	4		4	1	1	69	55+	Front Range	1.66
183	5		I like wolves.	1	1	1	1	1	5	1	4	4	1	3	1	1	4	3	0	2		3	5	7	58	55+	Western Slope	0.37
184	4			6	6	2	4	1	4	1	2	4	4	4	3	4	3	2	1	1		4	3	1	53	35-54	Front Range	1.66
185	5		it would be great to see the wolf re-introduced to Colorado, which would bring a great feeling that we are righting a wrong.	2	4	5	6	6	2	1	2	2	1	2	1	1	2	1	2	1,3	Snake, tortoises	5	4	8	46	35-54	Western Slope	0.37
186	2	they hunt in pack making it difficult to defend yourself if you are alone in the forest		2	7	4	1	1	4	0	1	1	1	4	1	3	2	1	0	4		4	3	2	68	55+	Front Range	1.66
187	4			6	5	5	7	5	4	1	2	1	1	1	1	1	2	1	0	4		4	5	1	46	35-54	Front Range	1.66
188	4			7	6	7	6	7	7	0	1	2	4	4	4	3	4	1	0	1		4	4	1	71	55+	Front Range	1.66
189	4			7	6	4	7	1	7	1	3	3	1	1	1	1	3	1	0	4		5	3	2	66	55+	Front Range	1.66
190	4			5	3	5	5	5	6	1	2	2	2	2	2	1	2	1	0	4		2	3	1	62	55+	Front Range	1.66
191	4			5	6	7	5	3	5	0	2	1	4	3	2	2	3	1	0	4		5	4	7	77	55+	Front Range	1.66
192	4			4	5	6	6	3	6	1	4	4	1	2	1	1	4	1	0	1		5	5	1	43	35-54	Front Range	1.66
193	6		Wolves were a part of the food chain. along with bears, mountain lions, and other predators, so they have a place here.	5	4	5	5	5	3	1	3	2	3	3	2	1	4	1	0	4		5	5	3	72	55+	Front Range	1.66
194	4			5	4	4	4	4	4	1	3	3	1	3	1	1	1	1	0	1		4	5	1	70	55+	Front Range	1.66
195	4			6	7	6	5	3	2	1	2	2	3	3	3	3	2	1	0	1		5	5	1	69	55+	Front Range	1.66
196	4			5	5	6	6	6	2	1	4	4	4	4	1	1	2	2	0	1		3	4	7	67	55+	Front Range	1.66
197	3	It the wolves, started to wander around, into, residential communities, it would have an impact, on people staying, more indoors.		6	6	6	5	5	5	0	1	1	1	2	1	1	1	2	0	4		3	2	3	44	35-54	Front Range	1.66
198	3	I would have to consider my safety in lonely places.		5	5	1	1	1	3	0	1	2	1	2	1	1	2	1	0	4		2	3	8	71	55+	Western Slope	0.37
199	4			4	4	4	3	4	4	0	2	3	3	3	2	1	2	1	0	4		5	3	6	69	55+	Western Slope	0.37
200	4			5	5	5	5	5	3	1	2	3	2	2	2	3	3	1	0	2		1	3	1	32	18-34	Front Range	1.66
201	4			6	5	5	6	3	4	1	1	1	1	3	1	1	2	1	0	4		5	5	3	59	55+	Front Range	1.66
202	4			4	5	4	3	3	5	1	2	2	1	2	1	1	2	1	0	4		2	3	4	70	55+	Western Slope	0.37
203	4			4	4	4	4	4	4	1	2	2	3	3	3	3	2	1	1	1		4	3	3	40	35-54	Front Range	1.66
204	6		I enjoy watching wolves. Been in Yellowstone in the winter to view wolves. Fantastic!!	1	2	3	5	4	1	1	4	4	1	2	1	1	4	1	0	1,2		5	4	1	63	55+	Front Range	1.66
205	4			1	1	6	5	6	6	1	2	2	2	2	1	1	2	1	0	4		3	2	4	24	18-34	Front Range	1.66
206	5		Increase the variety of wildlife.	3	5	5	5	5	3	1	2	2	1	2	1	1	2	1	0	4		5	5	2	70	55+	Front Range	1.66
207	4			1	2	7	7	5	5	1	1	1	3	4	1	1	1	1	0	4		5	4	2	55	55+	Front Range	1.66
208	4			5	4	3	3	3	4	1	3	3	2	2	1	1	3	1	0	1,2,3	A jungle of plants	4	3	6	62	55+	Front Range	1.66
209	6		It would help stabilize the ecosystem on the front range and mountains.	6	6	4	6	5	6	1	2	3	1	2	3	2	2	1	0	4		5	5	3	73	55+	Front Range	1.66
210	4			4	4	4	4	4	4	1	2	2	2	2	1	1	1	1	0	2		5	2	1	48	35-54	Front Range	1.66
211	7		i am an artist that paints wildlife	1	1	7	7	7	1	1	4	4	1	2	2	2	4	1	1	1		2	4	5	73	55+	Front Range	1.66
212	5		It would make me feel better about the place I live.	5	4	4	5	1	2	1	4	4	1	1	1	1	4	1	0	2		4	4	1	76	55+	Front Range	1.66
213	4			5	7	3	3	3	5	1	2	2	1	3	3	1	3	1	0	2		4	4	1	47	35-54	Front Range	1.66
214	4			5	7	6	7	6	5	1	2	4	1	3	1	2	3	1	0	2		5	3	1	58	55+	Front Range	1.66
215	2	My lively hood depends on deer, elk and live stock. Wolves WILL kill everything and move on, circle back when they wipe out the new area. I have seen this first hand in Wyoming, Idaho and Montana. The government stopped paying for wolf killed livestock. They claim they will pay bu make it impossible to get compensation.		7	7	7	1	4	7	0	4	3	4	4	4	4	4	2	1	1,2,3	horses	4	4	7	37	35-54	Western Slope	0.37
216	4			5	5	5	5	5	4	1	4	4	3	4	2	2	4	1	0	1,2,3	fish	5	4	1	49	35-54	Front Range	1.66
217	4			4	4	4	4	3	4	1	3	4	4	4	2	2	3	1	0	4		2	3	3	78	55+	Western Slope	0.37
218	4			5	6	5	5	4	4	1	1	1	4	4	2	2	2	1	0	2		5	5	1	82	55+	Front Range	1.66
219	5		I have yet to see a wolf in the wild and this would be another opportunity.	2	2	6	6	6	1	1	4	3	1	2	1	1	4	1	2	4		4	4	3	78	55+	Front Range	1.66
220	4			6	6	6	1	2	6	1	2	1	4	4	4	4	2	1	2	2		4	3	8	61	55+	Front Range	1.66
221	4			5	3	5	5	5	1	1	2	2	1	2	1	1	4	1	0	1		6	4	1	53	35-54	Front Range	1.66
222	4			4	5	5	5	3	5	1	3	3	4	4	3	3	3	1	0	4		4	3	2	49	35-54	Front Range	1.66
223	5		They would control unwanted pests	4	1	1	4	1	3	1	3	3	1	1	1	1	1	1	0	4		3	3	2	29	18-34	Front Range	1.66
224	7			2	3	1	4	2	2	1	2	1	1	1	1	1	2	1	0	1		5	4	1	53	35-54	Front Range	1.66
225	4			5	5	3	3	3	5	1	3	2	1	2	1	2	2	1	0	4		4	4	3	67	55+	Front Range	1.66
226	5		Expand wildlife possibilities	6	6	7	7	5	4	1	3	1	3	4	2	3	4	1	0	4		5	5	5	80	55+	Western Slope	0.37
227	5		help remove sick animals that could spread disease to humans.	6	7	6	6	6	6	1	3	3	2	3	2	1	3	1	0	2		2	2	2	67	55+	Front Range	1.66
228	4			4	5	3	5	1	5	1	1	1	1	1	1	1	1	1	0	2		4	4	1	32	18-34	Front Range	1.66
229	4			2	2	2	2	2	3	1	1	1	1	1	1	1	1	1	0	4		5	5	1	54	35-54	Front Range	1.66
230	4			6	3	7	7	2	4	1	1	2	1	1	1	3	3	1	0	2		4	5	5	49	35-54	Front Range	1.66
231	3	wolves are territorial and would then venture in to the cities as is the coyote and the bear and they would then prey on people and their pets for food to assure their species would survive thereby making the humans put a defense up to curtail their advancement as a carnivore.		4	3	4	4	4	4	0	1	1	4	4	3	2	2	1	2	4		2	3	3	69	55+	Front Range	1.66
232	4			6	5	4	6	4	5	1	3	4	1	3	1	1	4	1	0	3	fish in my pond	4	5	3	79	55+	Front Range	1.66
233	4			7	7	5	5	1	7	1	1	1	1	3	1	1	1	1	0	4		4	4	3	62	55+	Front Range	1.66
234	6		It is always good to preserve species	4	1	2	5	5	1	1	4	4	1	1	1	2	3	1	0	1		5	3	1	41	35-54	Front Range	1.66
235	4			5	3	7	7	7	6	1	4	4	3	3	1	1	4	1	0	1,2		5	5	7	57	55+	Front Range	1.66
236	4			6	2	6	6	6	2	1	3	3	1	3	1	3	3	1	0	4		4	4	2	56	55+	Front Range	1.66
237	4			3	7	7	7	5	6	1	4	1	1	2	1	1	4	1	0	4		5	5	3	72	55+	Front Range	1.66
238	4			6	5	5	5	3	1	1	1	3	1	1	1	1	1	1	0	2		3	4	2	29	18-34	Front Range	1.66
239	5		Wolves are known to eat coyotes. We are currently over run with coyotes that are getting braver and more intrusive in neighborhoods. Wolves would help control rabbit, coyote and other wildlife populations naturally. No poison, traps or shooting necessary.	5	5	5	5	4	5	1	2	2	2	3	2	2	2	1	0	1,2		5	3	2	65	55+	Front Range	1.66
240	4			4	4	4	4	4	4	0	1	1	1	1	1	1	1	1	0	4		4	5	2	67	55+	Front Range	1.66
241	5		Return the wildlife balance. Similar to their reintroduction in Yosemite.	6	6	4	4	4	5	1	1	1	4	3	2	3	2	1	0	1,2,3	Horse	5	4	8	67	55+	Front Range	1.66
242	4			6	6	5	5	5	6	1	1	1	2	2	1	1	2	1	0	4		3	3	3	60	55+	Front Range	1.66
243	4			5	5	4	5	2	5	1	3	2	1	2	1	1	3	1	0	1		3	5	6	67	55+	Western Slope	0.37
244	5		I love nature of all kinds	2	2	5	5	5	2	1	3	4	1	2	2	2	3	1	0	1		4	3	5	68	55+	Western Slope	0.37
245	4			6	4	6	6	4	6	1	1	1	1	3	1	1	2	1	0	4		3	5	1	60	55+	Front Range	1.66
246	4			4	4	4	4	4	4	1	1	1	1	1	1	1	1	1	0	4		2	5	2	69	55+	Front Range	1.66
247	4			5	4	3	3	3	6	1	1	1	2	3	2	2	2	1	2	4		5	3	5	72	55+	Front Range	1.66
248	7		It would balance the ecosystem in CO	1	1	1	1	1	1	1	1	1	4	4	4	4	4	1	0	2		4	4	3	52	35-54	Front Range	1.66
249	4			7	7	6	3	3	7	0	1	1	3	3	1	1	2	1	0	4		2	3	1	65	55+	Front Range	1.66
250	5		will bring more balance to the wild but I do not interact in the wild much	5	4	4	5	2	4	1	1	1	2	2	1	2	2	1	0	4		5	5	1	57	55+	Front Range	1.66
251	4			6	2	1	4	1	4	0	1	1	3	4	1	1	2	1	1	4		5	5	1	53	35-54	Front Range	1.66
252	4			3	2	6	6	3	1	1	2	2	4	4	1	1	2	1	0	2		5	5	3	56	55+	Front Range	1.66
253	4			3	3	5	6	5	2	1	3	3	1	1	1	1	2	1	0	2,3	Fish	NA	5	1	59	55+	Front Range	1.66
254	3	I would be slightly more afraid of being in wilderness areas.		7	5	5	6	2	4	0	1	1	1	1	1	1	3	1	0	4		4	4	4	65	55+	Front Range	1.66
255	4			6	5	5	5	4	5	1	2	2	2	2	2	2	2	1	0	1		4	3	5	68	55+	Front Range	1.66
256	4			6	7	4	6	7	7	1	4	3	3	4	4	2	4	1	0	4		3	2	3	33	18-34	Front Range	1.66
257	3	I think wolves could be dangerous and can hurt others.		4	4	4	4	4	4	0	1	1	1	1	1	1	1	1	1	1,3	Parrot	4	2	3	24	18-34	Front Range	1.66
258	4			5	5	5	5	5	5	1	1	1	1	1	1	1	1	1	0	1		5	5	1	76	55+	Front Range	1.66
259	3	Between mountain lions and wolves it will be a little more dangerous		5	4	1	2	2	5	1	1	1	1	1	1	1	1	1	0	2		5	2	2	36	35-54	Front Range	1.66
260	6		Because with wolves the population of elk and deer would decrease and become balanced	6	3	7	5	4	5	1	2	3	4	2	1	2	3	1	0	1		3	4	3	24	18-34	Front Range	1.66
261	6		They would return an important component of wildness to wilderness and help restore balance to ecosystems.	3	2	3	7	7	2	1	4	3	1	1	2	2	4	1	0	2		3	4	3	69	55+	Western Slope	0.37
262	4			5	3	3	5	3	1	1	2	2	2	2	2	2	2	2	0	1		6	3	3	47	35-54	Front Range	1.66
263	4			3	5	5	3	3	3	1	2	2	4	3	4	4	3	1	2	1		3	3	3	74	55+	Front Range	1.66
264	4			5	6	5	6	5	6	1	4	3	2	3	4	1	3	1	0	4		5	5	1	64	55+	Front Range	1.66
265	5		Kill more rodents	1	6	6	5	5	5	1	3	4	4	4	3	4	4	1	0	1		4	2	3	59	55+	Front Range	1.66
266	4			5	7	5	6	5	5	1	2	2	1	3	2	2	2	1	0	2		1	5	1	77	55+	Front Range	1.66
267	4			5	7	5	6	5	6	1	2	3	4	4	2	2	2	1	0	1		5	3	1	60	55+	Front Range	1.66
268	5		I think it would be cool to be hiking and have the opportunity to see some in the wild. This would result in more outdoor activities near known wolf locations/sightings.	7	5	7	2	4	6	1	2	1	2	2	1	1	2	NA	0	1		5	4	2	24	18-34	Front Range	1.66
269	4			5	6	4	5	3	6	1	1	1	2	2	4	2	2	1	0	4		4	3	2	51	35-54	Front Range	1.66
270	4			4	4	4	4	4	4	1	1	1	1	1	1	1	1	1	0	4		5	4	3	71	55+	Front Range	1.66
271	3	Safety		4	4	4	4	4	4	1	2	2	2	2	2	2	2	1	1	4		6	4	1	56	55+	Front Range	1.66
272	3	More danger During outdoor recreation.		7	7	7	1	1	5	0	3	2	4	4	4	4	1	1	0	1		5	4	1	71	55+	Front Range	1.66
273	4			5	5	1	1	1	5	1	3	1	1	1	3	3	2	1	0	1,2		3	2	2	64	55+	Front Range	1.66
274	4			5	5	1	1	1	6	1	2	2	3	3	1	1	1	1	2	1		5	5	2	68	55+	Front Range	1.66
275	4			5	5	5	5	5	5	0	1	1	1	1	1	1	2	2	0	4		6	5	2	70	55+	Front Range	1.66
276	4			5	6	3	3	2	6	1	2	3	1	3	2	1	1	1	0	4		5	3	4	67	55+	Front Range	1.66
277	4			4	5	4	4	4	2	1	3	1	4	4	4	4	4	1	0	1,2,3	Sheep, goats, llamas	4	3	8	57	55+	Front Range	1.66
278	6		The deer population is out of control in my opinion and having a natural predator to curtail that population would be a good thing	3	2	2	3	2	4	1	2	4	1	3	1	1	2	1	0	2		6	5	1	47	35-54	Front Range	1.66
279	4			5	5	5	5	3	5	1	3	3	1	2	1	1	3	1	0	3	fish	5	4	3	62	55+	Front Range	1.66
280	3	They could be a threat hiking.		7	7	5	3	3	6	0	3	3	4	3	4	4	4	1	0	1		5	5	2	59	55+	Front Range	1.66
281	4			5	6	5	5	5	5	1	2	2	2	3	1	1	1	1	0	4		5	4	2	73	55+	Front Range	1.66
282	4			7	7	7	5	1	6	0	1	1	1	4	1	1	3	1	0	4		5	5	1	62	55+	Front Range	1.66
283	4			6	5	5	2	4	5	1	2	3	2	4	2	2	2	2	0	4		4	3	1	71	55+	Front Range	1.66
284	4			6	6	5	3	3	5	1	1	1	1	1	1	1	1	2	2	4		5	4	3	49	35-54	Front Range	1.66
285	4			6	6	2	5	5	6	1	2	2	1	1	1	1	2	1	0	4		4	4	2	30	18-34	Front Range	1.66
286	7		To see wolves in their natural environment is a wonderful opportunity	4	7	7	7	4	1	1	3	3	3	3	2	1	3	2	0	1		5	5	2	56	55+	Front Range	1.66
287	4			3	5	5	5	1	3	1	1	1	1	4	2	2	3	1	0	4		5	5	2	60	55+	Front Range	1.66
288	4			2	3	6	6	6	1	1	3	3	1	3	1	3	3	1	1	2		5	5	3	47	35-54	Front Range	1.66
289	4			6	7	7	7	7	7	0	1	1	4	4	4	4	4	1	0	4		3	3	3	82	55+	Front Range	1.66
290	4			6	6	6	6	6	5	1	2	2	1	2	1	1	1	1	0	4		4	3	6	61	55+	Western Slope	0.37
291	4			5	5	4	6	6	4	1	1	2	1	1	1	1	2	1	0	2		4	5	5	50	35-54	Western Slope	0.37
292	4			6	7	7	7	7	7	1	1	1	1	1	1	1	1	1	0	1		4	4	5	66	55+	Western Slope	0.37
293	4			5	7	7	6	6	1	1	3	1	1	1	1	1	3	1	0	1		5	5	6	59	55+	Western Slope	0.37
294	4			4	4	4	4	4	4	1	1	1	1	1	1	1	1	1	0	2		4	5	5	68	55+	Western Slope	0.37
295	3	I live in the mountians ,rural area and could result in my pets being attacked and or my self		4	6	2	2	2	5	1	4	4	4	4	3	2	3	1	0	1		4	2	7	49	35-54	Western Slope	0.37
296	4			3	1	6	2	6	2	1	2	3	1	1	3	2	1	1	2	1,2		1	1	1	29	18-34	Eastern Plains	0.26
297	6		Hopefully it will control the deer population. That would make my life easier.	1	1	3	6	2	2	1	3	1	2	3	1	1	3	1	0	4		4	5	6	64	55+	Western Slope	0.37
298	4			2	3	1	5	1	1	1	1	1	1	1	1	1	1	2	0	1,2		4	2	1	50	35-54	Front Range	1.66
299	3	always need to watch for them when in the wild		7	7	7	5	6	7	0	1	1	3	4	1	3	1	1	0	4		4	4	6	75	55+	Western Slope	0.37
300	1	Why the negatively impact my livelihood and quality of life is because the would be killing the livestock that I take care of for work!		7	7	7	7	1	7	0	1	4	4	2	4	4	2	1	0	1,2		2	2	8	20	18-34	Western Slope	0.37
301	4			3	7	4	3	5	4	1	4	4	2	4	2	4	4	1	0	4		3	4	7	75	55+	Western Slope	0.37
302	5		Knowing they were there would improve my attitude.	3	3	6	6	6	3	1	3	1	2	2	2	1	3	1	0	4		2	4	7	63	55+	Western Slope	0.37
303	6		I would feel good that the wolves are back	5	5	5	5	3	1	1	3	4	1	2	1	1	4	1	0	1		3	2	6	29	18-34	Western Slope	0.37
304	3	People keep shooting them and the population is getting less and less every day		6	6	5	5	5	5	1	2	4	3	3	2	1	2	1	0	4		4	4	6	20	18-34	Eastern Plains	0.26
305	3	One more thing I'd rather not encounter in the wild.		7	6	7	7	7	7	0	2	1	4	4	3	2	2	1	1	1,2		4	5	7	59	55+	Western Slope	0.37
306	1	Being a hunter there are just a few opportunities to hunt in Colorado,and wolves would greatly reduce that		7	7	7	4	7	7	0	4	2	4	4	4	4	2	1	0	1		4	3	8	57	55+	Western Slope	0.37
307	4			3	6	7	7	5	6	1	4	4	1	3	2	1	4	1	0	2		5	5	2	61	55+	Western Slope	0.37
308	4			6	4	7	5	7	6	1	3	2	1	2	4	1	2	1	2	1		4	3	7	51	35-54	Western Slope	0.37
309	5		Wolves can have a positive impact on the ecosystem services that economically benefit us. Which will help reduce the risk of transmission illnesses like chronic wasting disease.	1	6	1	1	1	1	0	3	1	1	1	1	1	1	2	1	2		3	2	3	32	18-34	Front Range	1.66
310	4			4	5	7	7	7	4	1	3	3	1	3	1	2	3	1	0	1,3	bird	4	4	6	28	18-34	Western Slope	0.37
311	2	I feel like wolves will make a decrease the population of other animals and can possibly harm humans too		2	4	3	5	3	5	0	2	3	2	4	2	3	2	2	1	1,4		2	4	3	22	18-34	Front Range	1.66
312	4			6	4	5	4	4	4	0	1	1	3	1	3	3	3	2	1	4		4	3	3	29	18-34	Western Slope	0.37
313	7		More species	1	1	1	1	1	1	1	4	4	4	4	1	1	1	2	2	1		4	3	1	34	35-54	Front Range	1.66
314	4			6	4	5	6	5	3	1	1	2	1	3	1	1	2	2	0	2		2	2	2	22	18-34	Front Range	1.66
315	5		It would give me a better piece of mind knowing that we are helping to preserve the unique ecosystem of Colorado	6	2	3	7	7	2	1	4	4	1	1	1	1	4	2	0	4		3	4	1	23	18-34	Front Range	1.66
316	3	I woukd be scared to let my kids go camping domesticated wolves are great but wild wolves scare me. They are awesome and fascinating creatures though		3	3	7	5	1	3	0	2	2	3	4	2	2	1	2	3	1,2		3	3	2	24	18-34	Front Range	1.66
317	6		Currently, there is a large population of mule deer that wander the neighborhoods of Colorado Springs. Introducing wolves could help control this population reducing car accidents and deer wasting decease	2	5	2	2	2	6	1	4	4	4	3	4	2	4	2	0	1		3	4	1	28	18-34	Front Range	1.66
318	4			5	4	4	3	3	2	0	2	2	1	1	1	1	1	2	0	4		1	4	6	31	18-34	Front Range	1.66
319	5		great opportunity to learn about wolves and the environment	5	2	5	3	4	6	1	3	3	2	2	1	1	3	2	2	4		5	3	1	35	35-54	Front Range	1.66
320	3	Worrying that it might show up while I‚Äôm taking a run with my children		4	1	7	7	7	4	1	2	2	2	2	1	2	2	2	2	4		4	2	2	26	18-34	Front Range	1.66
321	7		Because it would bring more tourists	4	5	6	6	6	7	1	4	4	2	2	2	4	4	2	0	1,2		3	3	3	32	18-34	Front Range	1.66
322	4			5	5	5	5	2	2	1	3	3	1	1	1	1	3	2	0	1		5	4	3	24	18-34	Front Range	1.66
323	4			4	1	6	1	1	6	1	3	3	4	3	3	4	2	2	1	1		2	2	1	31	18-34	Front Range	1.66
324	4			3	2	6	6	2	2	1	3	3	1	1	1	1	2	2	0	1		2	4	2	24	18-34	Front Range	1.66
325	5		Would be able to see them in the wild and cause more attention to protecting them and their habitats	4	2	2	1	1	1	1	2	2	1	2	2	2	2	2	2	1		4	4	3	30	18-34	Front Range	1.66
326	4			3	3	2	2	2	3	1	2	2	1	2	1	1	2	2	1	1		5	4	1	33	18-34	Front Range	1.66
327	4			5	1	3	6	5	6	1	3	4	3	4	1	1	4	2	1	1		3	3	7	20	18-34	Western Slope	0.37
328	4			5	5	6	6	3	2	1	2	2	4	4	2	4	2	1	1	1,2		3	4	2	27	18-34	Front Range	1.66
329	4			4	4	4	5	5	2	1	2	3	3	1	1	1	1	2	2	1		5	2	1	19	18-34	Front Range	1.66
330	6		Wolves are majestic creatures and many people don‚Äôt get to see how wonderful they truly are	5	3	1	1	1	2	1	3	3	3	1	2	3	2	2	0	1,2		2	2	3	22	18-34	Front Range	1.66
331	4			4	6	7	7	6	6	1	3	3	3	3	1	1	2	1	0	4		5	4	2	34	35-54	Front Range	1.66
332	3	Could attack me		6	3	5	5	5	5	0	1	1	1	1	1	1	2	2	2	4		3	5	1	32	18-34	Front Range	1.66
333	4			4	5	7	5	5	6	0	1	1	1	1	1	1	1	2	0	1		4	4	1	27	18-34	Front Range	1.66
334	4			4	3	4	3	4	5	1	2	1	1	1	1	1	1	1	2	1		3	4	3	34	35-54	Front Range	1.66
335	7		It will reduce the number of pests	5	2	1	1	1	6	1	4	4	1	1	2	2	4	2	0	2,3	Rat	4	3	1	32	18-34	Front Range	1.66
336	4			7	7	7	6	1	4	0	1	1	3	3	2	2	1	2	1	2		4	2	5	28	18-34	Western Slope	0.37
337	4			5	3	5	6	5	4	1	1	1	1	1	1	1	1	2	0	4		4	4	1	27	18-34	Front Range	1.66
338	5		I love seeing wolves and learning about them! It's a positive thing to experience as much as you can before you die	4	5	4	4	3	5	1	2	4	2	3	3	3	3	2	2	1,2		5	2	8	18	18-34	Western Slope	0.37
339	4			7	5	4	6	5	1	1	2	2	1	1	1	1	2	2	0	2,3	Snake	3	2	4	21	18-34	Western Slope	0.37
340	4			4	4	4	4	4	4	1	1	1	1	1	1	1	1	2	2	4		3	2	7	35	35-54	Eastern Plains	0.26
341	6		I think it would help keep wildlife populations healthy and increase the ‚Äúwildness‚Äù of Colorado. Plus, I would love for there to be wolves in CO!	5	4	4	4	4	4	1	4	2	4	4	1	1	3	2	1	1		4	3	7	24	18-34	Western Slope	0.37
342	4			4	4	4	4	4	4	1	1	1	1	1	1	1	1	2	2	4		3	2	7	35	35-54	Eastern Plains	0.26
343	4			7	6	3	3	3	5	1	2	2	2	2	2	3	2	2	0	4		3	3	7	34	35-54	Western Slope	0.37
344	7		I Love wolves and they are so pretty	6	1	6	6	6	6	1	4	4	4	4	1	4	1	2	0	1		3	2	4	22	18-34	Western Slope	0.37
345	6		We work outside and it would be great to see and hear wolves again	5	5	7	6	7	7	1	4	3	4	4	4	1	2	2	0	1		4	5	7	48	35-54	Western Slope	0.37
346	4			3	3	3	3	3	4	1	2	2	1	2	1	1	1	2	0	2		3	2	4	52	35-54	Western Slope	0.37
347	4			1	1	1	1	1	1	1	4	4	1	2	1	1	2	2	2	1		2	3	5	33	18-34	Eastern Plains	0.26
348	7		I do a lot of hiking and love to see the wildlife that is in this area. Seeing wolves in the wild would be exciting and offer good photo opportunities for myself and others.	7	7	7	7	7	1	1	1	1	1	1	1	1	1	2	0	1,2,3	Birds and fish	4	2	2	55	55+	Western Slope	0.37
349	2	My husband and I rely on wild game meat that we hunt ourselves, and reintroducing a predator with a high reproduction rate that hasn‚Äôt been around for decades seems counterintuitive until there is a proven way to keep them in check.		7	7	7	2	3	7	0	4	2	3	4	4	4	4	2	0	1		5	2	6	31	18-34	Western Slope	0.37
350	4			5	2	2	1	1	1	1	2	2	1	2	1	1	2	2	2	1,2		5	4	8	69	55+	Western Slope	0.37
351	5		I think animals should be in their natural environment, not displaced for human greed.	4	2	4	4	4	2	1	3	3	2	3	1	1	3	2	0	1		2	3	8	44	35-54	Western Slope	0.37
352	5		Wolves have been a favorite animal of mine since childhood so knowing and being able to see them in the wild would be awesome.	5	4	6	4	5	5	1	2	2	1	1	1	1	2	2	0	4		3	4	6	27	18-34	Western Slope	0.37
353	4			6	6	7	5	5	6	1	2	1	1	3	1	1	2	2	0	1,2,3	Turtle	3	5	4	27	18-34	Western Slope	0.37
354	7		They would help Out environment	7	7	7	7	7	7	1	4	4	2	4	1	1	1	2	1	1		1	2	6	36	35-54	Western Slope	0.37
355	6		It would kill off all the stupid city people that enter the wild	4	4	4	4	4	4	1	1	1	1	1	1	1	1	1	0	1		3	3	8	38	35-54	Western Slope	0.37
356	4			6	6	7	7	5	5	1	2	2	4	4	4	4	1	2	0	1		1	1	7	20	18-34	Western Slope	0.37
357	4			7	2	5	6	6	1	1	4	4	3	4	2	3	4	2	0	1,2		3	2	2	24	18-34	Western Slope	0.37
358	4			1	2	5	1	5	1	1	3	4	1	1	1	1	2	2	0	2		4	3	3	21	18-34	Western Slope	0.37
359	4			6	7	7	7	7	7	1	1	1	3	1	2	4	1	2	1	1,2		2	3	4	32	18-34	Western Slope	0.37
360	4			5	5	3	3	2	6	1	3	3	2	3	3	2	3	2	2	3	Turtle	4	5	6	43	35-54	Western Slope	0.37
361	6		My husband's family owns a winery and vineyards the current deer population has destroyed hundreds of vines that now have to be removed and replaced with a waiting time of 5-10 years for the vine to reach maturity and produce a decent harvest a hit in deer population would be greatly beneficial	5	5	4	5	5	5	1	3	3	4	4	1	1	3	2	2	1,3	2	3	3	3	24	18-34	Western Slope	0.37
362	7		Wolves are very important to the eco system thus our way of living would be positively impacted.	6	1	5	3	6	5	1	4	4	2	4	3	3	4	2	0	1,2		2	2	6	30	18-34	Western Slope	0.37
363	4			4	4	3	3	3	4	1	1	1	2	3	4	3	2	2	2	1		4	2	8	24	18-34	Western Slope	0.37
364	6		Seeing mother nature is beautiful.	3	2	3	5	5	5	1	3	3	2	1	2	2	1	2	2	1,3	Turtle	3	2	7	29	18-34	Eastern Plains	0.26
365	6		They need help	2	2	4	3	3	3	1	2	1	1	1	3	2	2	1	0	2		1	2	7	25	18-34	Western Slope	0.37
366	4			5	2	2	2	2	2	1	1	1	1	1	1	1	1	2	0	1		1	3	7	52	35-54	Eastern Plains	0.26
367	5		because it would give me another reason or purpose to introduce my life into an out-door related sense, such as trips, scouts, tours, or even a study.	2	6	7	7	4	3	1	2	1	3	3	1	1	4	1	0	2,3	ghost	2	2	2	23	18-34	Western Slope	0.37
368	4			5	5	7	6	6	4	1	1	2	2	2	1	1	1	2	2	1		3	2	4	22	18-34	Western Slope	0.37
369	4			3	1	6	5	6	1	1	3	2	2	2	1	1	1	2	0	1,2,3		3	2	5	44	35-54	Eastern Plains	0.26
370	7		Wolves are good for the enviroment	5	7	7	7	7	1	1	4	4	4	4	1	1	3	2	0	1,2		2	2	8	54	35-54	Eastern Plains	0.26
371	4			7	4	7	7	4	1	1	4	4	2	4	4	4	4	2	0	1,2		3	2	6	28	18-34	Eastern Plains	0.26
372	4			5	5	5	5	5	5	1	2	2	3	4	1	1	3	2	0	4		2	2	8	47	35-54	Western Slope	0.37
373	5		Because they are life they may be hamrful and hunt people but they are life	6	5	4	4	4	3	1	2	2	2	3	3	3	2	2	2	1		6	5	1	87	55+	Western Slope	0.37
374	7		I Love the wolfs they are so pretty	5	1	5	6	5	1	1	4	4	4	4	4	4	4	2	0	1		3	2	4	22	18-34	Western Slope	0.37
375	4			4	4	4	4	4	4	1	1	1	1	1	1	1	1	2	2	4		3	2	8	35	35-54	Eastern Plains	0.26
376	4			5	5	5	5	4	3	0	1	2	3	4	4	4	4	2	0	1		4	3	6	69	55+	Western Slope	0.37
377	5		They would help control rodent and vermin populations	6	7	7	6	5	1	1	2	1	3	4	3	3	2	1	0	1,2		3	3	7	54	35-54	Western Slope	0.37
378	4			4	5	5	4	5	4	1	3	4	2	2	1	1	3	2	4	1,2		3	2	3	25	18-34	Western Slope	0.37
379	4			1	5	1	1	1	1	1	1	1	2	1	2	1	1	2	2	1,2		3	2	7	29	18-34	Western Slope	0.37
380	4			5	3	5	6	4	5	1	1	1	1	1	1	1	1	2	1	2		1	2	2	24	18-34	Western Slope	0.37
381	4			4	4	4	4	4	4	1	2	2	2	2	2	2	2	2	0	4		3	2	3	20	18-34	Western Slope	0.37
382	4			4	5	4	5	4	5	0	1	1	1	1	1	1	1	2	3	4		1	2	5	35	35-54	Eastern Plains	0.26
383	4			4	3	5	4	4	2	1	2	1	1	1	2	1	1	2	0	2		2	2	2	30	18-34	Western Slope	0.37
384	4			6	6	4	4	4	2	1	1	1	1	1	1	1	1	2	0	1,2,3	Parrot	2	3	8	63	55+	Western Slope	0.37
385	4			5	6	6	4	4	5	1	2	2	3	3	3	2	2	2	1	1,2		4	4	4	32	18-34	Western Slope	0.37
386	4			5	6	7	4	6	6	1	2	1	4	3	3	4	2	2	0	1,2		3	3	6	22	18-34	Western Slope	0.37
387	4			7	5	4	1	1	7	1	3	4	4	3	4	1	3	2	0	1,2		2	2	3	20	18-34	Western Slope	0.37
388	2	I would stop doing outdoor activities and would always be afraid or going outside		3	3	6	3	3	5	0	1	3	3	3	2	1	2	2	2	4		1	2	4	22	18-34	Western Slope	0.37
389	4			5	6	6	6	5	5	1	3	3	3	2	3	2	3	1	1	1		3	3	4	23	18-34	Western Slope	0.37
390	4			6	1	1	1	1	5	1	3	4	4	3	1	1	1	2	0			3	2	5	21	18-34	Western Slope	0.37
391	4			4	4	4	4	2	1	1	3	3	2	2	3	3	2	2	0	1		1	4	5	21	18-34	Western Slope	0.37
392	6		Just would be fun to go for nature drives and possibly see or hear one howl	4	4	4	4	4	4	1	4	4	2	2	1	2	3	1	1	4		3	2	6	42	35-54	Eastern Plains	0.26
393	6		I believe perserving our wildlife as it was meant to be would keep the balance intended and when the positive action is being taken, we all benefit.	7	1	5	5	5	1	1	3	3	4	4	3	3	1	2	0	2		3	2	2	52	35-54	Western Slope	0.37
394	6		Because they were here first. Humans are the ignorant ones. If ranchers, tourists were more aware (about ALOT of wild life issues), I believe people are very uninformed & just do NOT care about the livelihood of many wild life issues. Eco-systems, etc. We-humans-don't or care to know. THEY were here first. WE -are the intruders.	2	4	4	7	5	4	1	3	3	1	1	1	1	3	2	0	2		5	3	8	57	55+	Western Slope	0.37
395	5		no reason	4	4	4	4	4	4	1	2	2	2	2	2	2	2	1	0	2		1	2	8	30	18-34	Western Slope	0.37
396	2	They would make me feel uneasy hiking or being outdoors to much or going camping. Plus I would worrie about my pets being outside		5	5	5	6	6	3	0	2	3	3	1	1	1	1	2	1	1,2		1	2	6	22	18-34	Western Slope	0.37
397	5		I do not like rodents. If the wolf populations were returned to Colorado there would be less rodents	7	5	7	5	7	7	1	2	2	2	2	4	2	1	2	1	1,2,3	Horse, Geese, rabbits, ducks, parakeets	4	2	6	27	18-34	Western Slope	0.37
398	2	Reduction in hunting tag available. Attacks when enjoying the great outdoors.		7	7	7	1	7	7	0	1	1	4	1	4	4	3	2	2	4		4	2	6	32	18-34	Western Slope	0.37
399	1	They would have a significant negative effect on my community		7	7	7	7	7	7	0	1	1	4	4	4	4	1	2	0	1,2,3	Chicken	3	3	7	32	18-34	Western Slope	0.37
400	4			4	4	4	4	4	4	1	1	1	1	1	1	1	1	2	2	4		3	2	8	35	35-54	Eastern Plains	0.26
401	4			4	3	5	6	5	3	1	3	3	4	4	3	4	3	2	0	1,2		4	5	8	61	55+	Eastern Plains	0.26
402	4			5	3	5	1	1	1	1	2	2	3	2	3	1	2	2	0	1		3	4	6	28	18-34	Western Slope	0.37
403	4			3	1	1	1	1	1	1	4	4	1	2	1	1	4	2	1	1		2	2	6	19	18-34	Western Slope	0.37
404	4			5	1	1	1	1	1	1	1	1	1	1	1	1	2	2	0	1		1	3	7	52	35-54	Eastern Plains	0.26
405	4			6	6	7	1	1	6	0	4	4	2	2	2	2	4	2	0	1		3	3	5	33	18-34	Western Slope	0.37
406	4			5	5	2	3	2	6	1	1	2	4	4	4	2	1	2	0	1		6	5	8	35	35-54	Western Slope	0.37
407	5		Improve the eco system	4	6	6	6	5	4	1	3	4	3	4	3	2	3	2	2	1		3	3	5	39	35-54	Eastern Plains	0.26
408	4			6	6	5	5	4	6	1	3	2	3	2	3	3	3	2	0	1,2		3	3	7	24	18-34	Eastern Plains	0.26
409	4			4	4	4	4	4	4	1	3	3	3	3	3	3	3	2	2	4		2	2	4	22	18-34	Western Slope	0.37
410	5			5	1	5	7	5	1	1	1	1	1	1	1	1	1	2	0	1,2,3	Fish and birds	4	4	5	26	18-34	Western Slope	0.37
411	7		I don't know	5	5	6	6	6	5	1	1	1	1	1	1	1	1	2	0	1,2		1	2	2	52	35-54	Western Slope	0.37
412	6		I love wolves. They are a beautiful animal and deserve to stay populated and not killed off or go extinct. They are an important part of the eco system and balancing out of other animals.	3	3	5	4	2	1	1	4	3	1	2	2	1	3	2	0	1		2	2	4	30	18-34	Western Slope	0.37
413	4			1	1	1	4	4	1	1	1	1	1	1	1	1	1	2	2	1		1	2	4	25	18-34	Western Slope	0.37
414	4			5	4	4	3	3	4	0	3	2	2	3	2	1	3	2	0	1		4	5	6	28	18-34	Western Slope	0.37
415	5		it would be fun to see them	7	5	6	7	6	5	1	2	1	3	3	1	1	2	2	1	4		5	4	7	25	18-34	Western Slope	0.37
416	4			4	4	4	4	4	4	1	1	1	1	1	1	1	1	2	0	1		4	2	6	43	35-54	Western Slope	0.37
417	7		It's just cool knowing that they're not going extinct.	3	5	1	2	2	1	1	4	4	2	1	1	1	1	2	0	2		2	2	7	23	18-34	Western Slope	0.37
418	4			1	5	4	1	1	1	1	1	1	2	1	1	2	2	2	0	1		2	2	5	53	35-54	Western Slope	0.37
419	6		Because they will make the environment better and also just because I love wolves.	3	1	7	6	6	1	1	1	1	1	1	1	1	1	2	3	1		3	2	7	32	18-34	Western Slope	0.37
420	5		Because i would go out more to see them and be able to explore more of Colorado	6	1	4	5	3	4	1	1	1	1	1	2	1	1	2	0	1		2	2	5	26	18-34	Western Slope	0.37
421	1	Why mess with mother nature		7	7	6	1	6	7	0	3	1	4	4	4	1	1	2	2	1,2		4	4	7	31	18-34	Western Slope	0.37
422	3	Friends and family would fear the outdoors. It will cut down on hunting opportunity for me. I think it's bad for Colorado because it will decrease the hunting tourism.		7	7	6	5	3	7	0	3	2	4	4	4	1	2	1	0	1		4	3	5	33	18-34	Western Slope	0.37
423	5		While hiking I've been chased by moose several times up in the Grand County area. I'd like to see them culled by the wolves.	3	5	6	7	6	6	1	3	3	4	4	4	1	3	2	0	1		6	4	8	55	55+	Western Slope	0.37
424	4			5	5	4	5	5	1	1	2	1	1	1	1	1	3	2	1	1		4	5	4	56	55+	Western Slope	0.37
425	5		It would afford me the opportunity to observe wolves in the wild	3	6	7	7	7	3	1	3	1	3	4	2	2	2	1	0	1,2		3	3	8	53	35-54	Western Slope	0.37
426	6		They would balance everything out the way it should be. Take Woodland Park, Colorado for example right now. There is an over population of deer and ideas have been purposed to the city council but no one wants to really act while the population continues to grow and deer keep getting hit by cars.... all the time.	4	6	4	6	5	1	1	1	1	1	1	1	1	1	2	4	1		4	3	5	41	35-54	Western Slope	0.37
427	7		Wolves are an integral part of the natural ecosystem. My work revolves around the outdoors and the health of the environment and all of my free time is spent in nature. Nature needs balance, wolves help provide that balance.	4	3	5	1	5	5	1	2	1	4	3	4	3	3	2	0	4		3	2	6	29	18-34	Western Slope	0.37
428	2	I don't care for it they are pest just like the deer if they are on my property I will kill them		5	7	7	7	7	7	0	1	1	4	4	1	1	1	1	0	1,2,3	fish	2	2	8	71	55+	Western Slope	0.37
429	4			4	5	6	1	1	5	1	1	1	1	1	1	3	1	1	0	4		2	2	1	23	18-34	Western Slope	0.37
430	3	I would be afraid to go out into the wilderness at night, but I dont really do that anyways		5	5	4	5	3	6	1	2	4	1	2	1	1	3	1	2	2		5	5	3	29	18-34	Western Slope	0.37
431	6		Knowing that wildlife is comfortably thriving around me, ad it also keeps humans in check to not over expand the population and not destroy wild lands	5	1	5	5	5	5	1	4	4	2	3	1	2	3	3	0	2		2	2	1	19	18-34	Western Slope	0.37
432	4			4	1	5	5	5	1	1	2	2	1	1	1	1	2	2	4	2		3	3	7	29	18-34	Western Slope	0.37
433	4			1	1	1	1	1	1	1	3	3	4	4	2	4	3	2	1	1,2,3	Fish	5	3	8	53	35-54	Eastern Plains	0.26
434	5		Increased tourism, decrease in chance of hitting deer/elk on roadways.	5	2	4	7	1	5	1	4	4	3	2	3	2	3	2	2	1,2		3	3	4	43	35-54	Western Slope	0.37
435	6		I believe wolves would help me learn more about them when seeing them in nature . Wolves are different in captivity. I want my grand children great grand children to know about them not as a past tenths creature. They help our environment in many ways. I've been following wolves in other states and like how they are helping with disease control and the growth oflife its self.	4	5	5	6	5	1	1	2	2	3	3	2	3	3	2	1	1		2	2	6	60	55+	Western Slope	0.37
436	6		They help balance out nature of predator and prey.	6	5	4	4	3	6	1	1	1	2	2	3	3	3	3	0	1		1	2	5	18	18-34	Western Slope	0.37
437	4			6	6	5	5	5	2	1	2	1	1	1	1	1	1	2	1	1		3	2	2	19	18-34	Western Slope	0.37
438	4			4	2	5	3	5	4	1	1	1	1	1	1	1	1	2	0	2		2	2	5	22	18-34	Western Slope	0.37
439	4			4	4	4	4	4	4	1	1	1	1	1	1	1	1	2	0	2,3	Rodant	1	4	6	21	18-34	Western Slope	0.37
440	6		They would be able to live just as they always have been meant to	6	7	3	3	5	3	1	1	1	1	1	1	1	1	2	2	1		4	3	4	41	35-54	Western Slope	0.37
441	7		I have always loved the wolves and I think they would definitely impact the quality of life. They stay with one mate for .life and are very family oriented	5	1	7	7	7	1	1	3	3	1	1	1	1	3	2	0	4		1	2	7	77	55+	Eastern Plains	0.26
442	7		Wolves would positively effect me if I should be lucky enough to see one in the wild	6	6	6	7	6	5	1	4	4	3	4	3	3	3	2	0	1		4	2	6	60	55+	Western Slope	0.37
443	7		They are apart	1	1	1	1	1	1	1	3	3	3	3	3	3	3	1	0	1,2,3	Horse, rodent, reptiles	6	5	4	23	18-34	Western Slope	0.37
444	7		There beautiful and amazing and just like sharks if people understand more about wolves they'd love them	7	4	5	7	7	1	1	2	4	1	1	1	1	1	2	0	1		4	5	7	53	35-54	Western Slope	0.37
445	5		Because I like animals. But really, I have no idea how it would positively or negatively impact me unless I were to actually run into a wolf.	5	2	6	7	6	1	1	3	4	2	2	1	1	1	2	0	2,3	Birds and bunnies	3	4	6	29	18-34	Eastern Plains	0.26
446	3	I would be unsure about taking my grandsons into a wilderness area.		6	7	7	4	6	6	0	1	1	2	3	1	1	1	2	0	1		3	4	5	65	55+	Western Slope	0.37
447	5		Wolves have always interested me but I can't seem to ever see one in the wild so its somewhat saddening	7	3	5	6	5	6	1	2	2	1	2	1	2	3	1	2	4		3	2	4	22	18-34	Western Slope	0.37
448	3	The wolves will eat up there welcome within years		7	7	7	1	1	7	1	2	2	4	4	4	4	2	1	0	4		1	1	7	30	18-34	Eastern Plains	0.26
449	3	They would be roaming around in Colorado and maybe in peoples back yard. They would eat many wildlife and even cause extinction		5	4	5	6	4	5	1	2	3	2	4	4	2	1	1	2			3	2	5	18	18-34	Eastern Plains	0.26
450	3	Outdoors would be less save		6	7	7	3	5	6	1	2	2	1	2	2	3	4	2	0	1,2,3	Horses, chickens	5	4	8	67	55+	Western Slope	0.37
451	3	My family owns a lodge in the mountains and much of my family‚Äôs life outside of work/school is spent in the mountains riding UTVs and hiking in the summer and then snowmobiling in the winter. We build fires in the canyon at night in the fall and let our dogs roam. Tourism is huge in regards to our family income. I feel the possibility that wolf reintroduction would affect that, even if only wit…		7	7	5	3	3	6	0	2	2	2	3	2	1	2	2	2	1		6	5	5	33	18-34	Western Slope	0.37
452	4			4	4	4	4	4	4	1	2	2	2	1	1	1	1	2	0	1		1	3	3	22	18-34	Western Slope	0.37
453	6		I know this may sound silly but after seeing a documentary on Netflix, I have been wanting to be more involved in returning the life these poor almost extinct animals knew before us humans came and ruined everything. It would feel great knowing they were returned to their home and that I have higher chances of spotting one while on a hike or just driving through the mountains.	2	4	7	1	6	1	1	1	2	1	3	1	1	1	2	0	2		2	2	7	26	18-34	Western Slope	0.37
454	2	What if they wander into our neighborhoods		5	3	2	3	2	7	0	1	2	1	2	1	1	1	2	0	3	Fish	4	5	5	28	18-34	Western Slope	0.37
455	6		Having wolves reintroduced to Colorado will allow children and adults both the opportunity to witness true nature and show how they would live in the wild.	1	2	3	3	1	3	1	1	1	1	1	1	1	1	NA	2	1,2,3	Snake	1	2	6	22	18-34	Western Slope	0.37
456	5		I would love to be able to maybe have a chance at seeing a wolf and feel it would be good to have them a part of colorado as they once were	5	3	1	1	1	5	1	1	1	1	1	1	1	1	2	3	4		2	2	6	28	18-34	Western Slope	0.37
457	4			4	4	4	4	4	4	1	3	3	1	1	1	1	3	2	0	1		4	3	5	20	18-34	Western Slope	0.37
458	6		Being able to view them in the wild would improve the quality of life for all and improve the environment and deer and elk health	1	2	5	4	5	1	1	4	4	1	2	1	2	4	2	0	1,3	Horses	4	5	8	70	55+	Western Slope	0.37
459	5		I just do	4	3	4	4	4	4	1	2	2	2	2	2	2	2	2	0	1,2		5	3	1	28	18-34	Western Slope	0.37
460	4			5	4	3	4	4	1	1	2	2	1	2	1	1	2	1	2	1		3	2	5	28	18-34	Western Slope	0.37
461	7		Wolves, like any other natural species, have a reason for being in the environment and helping the natural circle of life. they are a very important part of the circle and should not be decreased or removed from that circle for any reason. if you think about it we took their place in many environments. we are the problem not the spercies of wolves. we need to stop trying to control any animal spe…	1	1	7	7	5	7	1	1	1	1	1	4	1	1	2	3	4		2	2	5	26	18-34	Western Slope	0.37
462	4			5	6	4	5	5	6	1	4	3	3	3	2	1	4	2	0	1,3	Ducks	4	4	5	28	18-34	Western Slope	0.37
463	6		I think wolves should be in their natural environment	6	5	6	5	6	5	1	1	2	1	2	1	2	1	1	1	1		5	5	1	34	35-54	Western Slope	0.37
464	3	I live in a rural area where there is more likely to be wolves. They would kill the elk and deer and decrease my hunting availability		7	7	7	6	6	7	0	2	2	4	4	3	3	2	2	0	1		3	2	8	24	18-34	Western Slope	0.37
465	4			4	5	6	6	5	5	1	1	1	1	1	1	1	1	1	0	4		3	2	2	22	18-34	Western Slope	0.37
466	4			5	6	5	6	4	6	1	2	2	3	3	1	1	2	2	0	2		3	3	3	63	55+	Western Slope	0.37
467	5		I just think they deserve to live here too. The would probably keep rodent populations under control and it is important they contribute to the biodiversity of this area	5	2	7	6	6	6	1	2	3	1	2	1	1	3	2	0	2		2	2	6	28	18-34	Western Slope	0.37
468	5		I love wolves but they keep the world at peace	7	7	7	7	7	7	0	4	4	4	4	4	4	4	1	0	4		1	1	1	19	18-34	Western Slope	0.37
469	6		They would be better for the environment	1	3	6	4	3	2	1	1	1	1	1	1	1	1	1	2	2,3	Rabbit	3	1	5	21	18-34	Eastern Plains	0.26
470	5		I feel that they would keep the deer, elk and rodent populations down.	6	7	7	4	4	7	1	4	4	3	4	1	1	3	2	2	2		1	2	8	30	18-34	Eastern Plains	0.26
471	4			3	3	4	4	4	1	1	2	2	1	2	1	1	2	2	0	1		3	3	8	71	55+	Western Slope	0.37
472	2	Because I think if they aren't controlled at some point they can enter residents and hurt either humans or pets and its happen before		4	4	4	4	4	4	1	3	1	1	1	1	1	1	2	0	1,2		4	2	4	31	18-34	Western Slope	0.37
473	1	They will attack our pets		7	7	7	7	7	7	0	1	1	1	1	1	1	1	2	0	4		1	2	6	18	18-34	Eastern Plains	0.26
474	6		Be much more interested in hiking	4	3	6	6	6	5	1	3	3	3	2	1	4	3	2	4	2		3	4	2	29	18-34	Western Slope	0.37
475	4			5	2	4	5	4	6	1	3	2	3	3	2	3	3	2	5	4		4	1	4	18	18-34	Western Slope	0.37
476	4			4	1	5	5	5	3	1	4	4	1	1	1	1	3	2	2	2,3	frogs	5	5	7	44	35-54	Western Slope	0.37
477	7		To go out to nature and see it from afar how could that not improve the quality of life. How would you feel to see buffalo or wild horses, I believe that it would be an awesome site to see. Nature in nature what a wonderful and beautiful concept.	2	6	4	1	4	4	1	4	4	4	4	4	1	4	2	2	1,2		2	2	8	29	18-34	Western Slope	0.37
478	4			7	4	1	1	1	7	0	4	1	4	4	4	4	4	1	0	4		1	1	4	34	35-54	Western Slope	0.37
479	7		Love them	4	4	4	4	4	4	1	2	2	3	3	2	3	3	2	0	1,2		2	2	6	20	18-34	Western Slope	0.37
480	7		They are my favorite animal.	7	2	2	2	6	5	1	4	4	4	4	3	1	3	1	0	1		5	4	4	29	18-34	Western Slope	0.37
481	4			3	2	5	6	5	1	1	3	4	2	2	1	1	2	2	0	2,3	Birds and bunnies	3	4	6	29	18-34	Eastern Plains	0.26
482	4			7	5	5	4	5	4	1	1	3	1	3	1	1	2	2	1	2		3	2	5	20	18-34	Western Slope	0.37
483	2	Dangerous		2	2	2	2	2	2	1	2	3	2	3	1	1	1	2	2	1		5	4	2	36	35-54	Eastern Plains	0.26
484	3	They would deter me from hunting out of fear for being attacked/killed my a wolf		7	7	7	1	6	7	0	3	2	4	4	3	1	1	2	2	1,2		4	4	7	31	18-34	Western Slope	0.37
485	5		I would like to know that wildlife can still live and thrive where they belong and not be displaced because of humans.	2	2	6	6	6	5	1	2	2	4	1	1	1	1	2	2	1,2		3	3	6	25	18-34	Western Slope	0.37
486	2	Would be afraid to leave my pets outdoors		3	7	5	5	5	3	0	3	3	2	2	3	3	2	1	3	1		2	2	6	33	18-34	Western Slope	0.37
487	3	I'd be afraid for my family and I for having an encounter with a wolf		7	7	5	6	6	6	0	1	1	1	1	1	3	1	2	2	2,3	Fish	3	2	5	32	18-34	Western Slope	0.37
488	4			7	6	5	5	4	6	1	2	4	2	3	3	4	2	2	1	1,2,3	Goldfish	4	3	5	24	18-34	Western Slope	0.37
489	7		It would make me appreciate wilderness even more and the beauty of wolves.	4	3	5	6	5	7	1	4	1	2	1	4	1	4	2	0	1		4	5	7	27	18-34	Western Slope	0.37
490	5		I feel like a large amount of the Colorado population are strongly involved in the outdoors lifestyle. Having wolves around would be great to have in our abundance of wildlife.	5	1	4	5	3	5	1	4	4	1	2	2	3	1	2	0	3	Fish	3	2	4	22	18-34	Western Slope	0.37
491	4			4	4	4	6	5	3	1	2	3	1	2	2	1	3	2	2	4		3	2	4	22	18-34	Western Slope	0.37
492	5		It will return the ecosystem to how it was before colonization of Europeans.	4	3	7	7	7	1	1	4	4	2	3	1	2	4	3	0	4		1	4	8	34	35-54	Western Slope	0.37
493	3	They would be everywhere and I wouldn‚Äôt feel safe anymore!		7	7	7	7	7	7	0	1	1	1	1	4	4	4	2	1	1		3	2	8	32	18-34	Western Slope	0.37
494	5		Wolf's would increase tourism and help with jobs	5	4	4	3	3	3	1	1	1	1	1	1	1	1	1	3	1		3	2	3	30	18-34	Western Slope	0.37
495	7		They were an integral part of the ecosystem and we took them out. It would make everything healthier by having the wolves back in Colorado.	5	5	7	7	3	1	1	4	3	2	3	1	3	2	2	0	1		5	4	6	58	55+	Western Slope	0.37
496	4			6	7	7	7	7	7	1	2	2	3	1	2	1	3	1	0	2		4	2	6	42	35-54	Western Slope	0.37
497	4			5	7	5	5	5	6	1	3	3	2	3	2	1	4	2	0	1		4	4	5	28	18-34	Western Slope	0.37
498	3	we live in the mountains at 7300 feet and would be cautious about walking our gravel road with our little dog		6	7	7	7	5	5	1	1	3	2	3	2	1	3	1	0	1		5	3	8	63	55+	Western Slope	0.37
499	3	Many of the local ranches would be impacted by wolves being reintroduced to Colorado. My family buys local meat, which could be affected. If wolves harm the hunting, it would directly affect the area in which I live.		7	7	7	4	4	7	0	1	1	3	3	2	2	2	2	2	1		4	4	7	34	35-54	Western Slope	0.37
500	4			1	1	5	5	5	1	1	3	4	1	3	1	1	2	2	0	1,2		4	4	2	56	55+	Eastern Plains	0.26
501	3	they would attack livestock,Deer,Elk and possible people aka hikers		6	6	2	2	1	1	0	1	1	1	1	1	1	1	2	0	4		3	3	3	64	55+	Western Slope	0.37
502	4			4	4	4	4	4	4	1	2	2	3	4	1	1	1	2	0	4		5	4	6	54	35-54	Western Slope	0.37
503	4			4	4	4	1	1	1	1	3	2	1	2	1	1	1	2	0	2		2	2	8	76	55+	Eastern Plains	0.26
504	4			6	5	4	4	3	4	1	1	3	3	4	2	1	2	2	1	1,2,3	Fish	3	2	8	51	35-54	Western Slope	0.37
505	4			5	6	6	5	2	3	1	1	1	3	4	2	3	2	1	0	4		4	4	6	65	55+	Western Slope	0.37
506	5		Would love to see them in the wild again.	3	1	5	5	5	1	1	1	1	4	3	4	3	1	1	0	1,2		4	5	8	74	55+	Western Slope	0.37
507	4			5	6	7	7	7	6	1	1	1	3	3	1	1	3	1	0	1		4	4	5	66	55+	Western Slope	0.37
508	4			4	5	5	4	4	4	1	2	2	1	2	1	4	2	2	0	1,2,3	Horse goat cattle	3	5	8	69	55+	Eastern Plains	0.26
509	4			4	4	4	4	4	4	0	1	1	1	1	1	1	1	2	0	4		3	2	6	46	35-54	Western Slope	0.37
510	2	Because.		4	3	1	1	1	1	0	1	3	1	1	1	1	1	2	0	2		6	5	5	48	35-54	Western Slope	0.37
511	3	Because it might ruin my chance to fill my tag during hunting season		6	7	6	6	3	7	1	1	1	1	1	3	2	1	1	1	1		4	3	2	20	18-34	Western Slope	0.37
512	5		Growing up, I was always fascinated by the grey wolf. Knowing they are possibly going to be reintroduced into Colorado gives me positive feelings.	4	6	6	6	6	6	1	3	3	4	4	4	4	3	1	0	4		1	2	8	30	18-34	Eastern Plains	0.26
513	4			4	4	4	4	4	4	1	1	1	1	1	1	1	1	2	0	2		3	2	8	61	55+	Western Slope	0.37
514	4			5	5	5	5	3	5	0	2	2	1	3	1	1	3	1	2	1		4	4	5	67	55+	Eastern Plains	0.26
515	4			6	2	6	5	2	4	1	1	1	4	3	3	1	1	2	0	4		2	2	6	52	35-54	Western Slope	0.37
516	4			2	4	6	5	1	4	1	1	3	1	1	1	1	1	2	0	2		4	4	8	74	55+	Western Slope	0.37
517	4			4	4	4	4	4	4	0	1	1	1	1	1	1	1	2	0	4		2	2	4	26	18-34	Western Slope	0.37
518	4			5	6	5	5	3	4	1	3	2	1	3	1	3	3	NA	0	2,3	horse	4	5	8	79	55+	Western Slope	0.37
519	4			5	4	5	5	3	5	1	3	2	3	4	3	2	3	2	1	1,2		2	2	5	18	18-34	Western Slope	0.37
520	4			4	4	4	4	4	1	1	1	1	1	1	1	1	1	2	0	1,2,3	Horse	1	2	2	55	55+	Western Slope	0.37
521	4			5	5	5	5	3	4	1	2	2	1	3	1	3	2	2	0	2		5	4	8	56	55+	Western Slope	0.37
522	3	I like to roam in the mountains. Wolf packs are more dangerous than bears or moose.		3	3	2	2	2	1	0	3	2	4	4	3	3	3	2	0	1,2		4	4	7	69	55+	Western Slope	0.37
523	6		What a joy it would be to see wolf pack in the wild.	5	4	6	6	6	5	1	3	3	2	2	1	1	1	1	0	1,2		3	3	5	69	55+	Western Slope	0.37
524	7		like to walk in woods, also like to hunt. We don't need wolves here.	2	5	5	1	1	7	0	1	1	3	3	4	3	3	2	0	1,2		3	2	6	66	55+	Eastern Plains	0.26
525	4			5	6	5	6	5	5	1	2	2	1	1	2	1	2	2	0	4		3	4	5	39	35-54	Eastern Plains	0.26
526	3	Personal Fear of danger		5	5	4	5	6	5	1	4	4	1	4	1	2	3	2	0	4		5	5	4	63	55+	Western Slope	0.37
527	3	Wolves have shown that their reintroduction into areas that were wolf free was not a good move. They harmed wildlife way more than expected, and ranchers had herd losses they had never experienced before. States that followed this path have had nothing but trouble with wolves and have even had to permit wolf hunts to help control the size of the wolf packs. This is a terrible idea. What is next, …		7	7	7	1	7	7	0	2	1	3	4	2	2	3	1	0	4		4	5	8	71	55+	Western Slope	0.37
528	5		Wolves would positively impact my livlihood by presenting a new animal and an adorable animal wolves are my favorite	4	5	3	6	6	3	1	3	3	2	1	1	1	1	2	0	1		2	2	5	29	18-34	Western Slope	0.37
529	3	I hunt deer and elk for food for my family. If they are reduced in numbers it will be harder to feed my family.		7	4	7	3	6	7	0	3	2	4	4	4	3	2	2	0	1,2		2	2	6	57	55+	Western Slope	0.37
530	2	There hunters kill prey which is fine but kill and let go n kill again not cool		7	4	1	4	5	2	0	3	3	3	3	3	3	3	1	1	1		3	4	5	45	35-54	Western Slope	0.37
531	5		They would help our ecosystem	6	6	5	4	4	2	1	2	2	1	1	1	1	2	2	2	1		4	4	6	50	35-54	Western Slope	0.37
532	4			4	5	5	5	5	3	1	1	1	2	1	1	1	1	2	0	1		4	5	6	64	55+	Western Slope	0.37
533	4			4	5	3	6	4	5	1	3	3	2	3	2	1	2	2	0	4		4	5	7	72	55+	Western Slope	0.37
534	5		knowing that they will not become exticed	4	4	3	3	3	3	1	3	3	3	3	3	3	3	2	0	1,2		4	2	6	58	55+	Eastern Plains	0.26
535	4			6	7	7	3	3	7	0	1	1	4	4	4	4	2	2	4	1,2,3	horse	5	4	8	49	35-54	Eastern Plains	0.26
536	4			7	4	4	1	1	5	1	2	2	4	3	4	1	3	1	0	4		2	3	7	57	55+	Eastern Plains	0.26
537	4			5	5	5	5	5	6	1	1	3	1	1	1	1	1	2	3	1,2,3	Ferret	2	1	6	34	35-54	Eastern Plains	0.26
538	6		I have always loved the wolves and they stay with one mate forever and raise their offspring. I love going to Mission:Wolf to observe them	1	1	7	6	6	1	1	4	4	1	2	1	1	4	2	0	4		1	2	7	77	55+	Eastern Plains	0.26
539	6		Any move to restore balance in our ecosystem and potentially reverse some of the damage humans have caused is a positive things for all humans (including myself).	2	2	5	6	5	3	1	4	3	1	3	1	1	4	2	0	1		2	4	8	41	35-54	Eastern Plains	0.26
540	4			4	4	4	4	4	4	0	1	1	1	1	1	1	1	2	4	4		2	1	8	35	35-54	Eastern Plains	0.26
541	5		Bringing wolves back into the ecosystem of Colorado would result in a healthier balance to nature and increase tourism which benefits the economy of Colorado.	3	3	5	5	1	5	1	1	1	1	2	1	1	1	2	0	2		2	2	6	64	55+	Eastern Plains	0.26
542	5		I live in the mountains and would love to see a wolf in its natural habitat.	5	6	4	5	5	7	1	4	3	4	4	4	3	4	1	0	2		3	2	8	61	55+	Eastern Plains	0.26
543	4			6	6	5	5	4	5	1	2	2	2	2	2	2	2	2	0	3	fish	4	3	5	39	35-54	Eastern Plains	0.26
544	4			6	6	6	6	6	3	1	2	3	3	3	2	4	3	2	1	1,2		4	3	6	70	55+	Eastern Plains	0.26
545	5		Just knowing that there are predators higher in the food chain to keep other predators, such as coyotes (which are a nuisance), lower in population. Also, they way that hunting is good for wildlife population, so are natural predators. Personally, I want to hunt game in Colorado but I am from NC and can't right now because I haven't lived here long enough	5	6	5	5	5	6	1	3	2	3	3	3	1	4	2	0	4		3	3	7	25	18-34	Eastern Plains	0.26
546	6		I like wolves overall	6	6	6	6	6	6	1	4	4	4	4	4	4	4	2	2	1,2		6	5	1	44	35-54	Eastern Plains	0.26
547	4			4	4	6	5	6	4	1	1	1	3	3	3	1	1	2	0	1		2	2	3	38	35-54	Eastern Plains	0.26
548	5		Growing up, I was always fascinated with wolves, and often wrote assignments with the grey wolf as my topic. Knowing the grey wolf reintroduction could possibly take place would bring slight joy to my quality of life.	5	7	7	7	7	7	1	1	1	1	1	1	1	1	1	0	4		1	2	8	30	18-34	Eastern Plains	0.26
549	4			6	6	6	7	6	5	1	3	4	4	3	4	3	3	1	0	1,2		2	3	7	49	35-54	Eastern Plains	0.26
550	4			4	4	4	4	4	4	1	1	1	1	1	1	1	1	2	0	1		2	2	3	38	35-54	Eastern Plains	0.26
551	4			4	7	5	2	5	6	0	1	1	4	3	2	2	2	2	1	2		4	5	5	36	35-54	Eastern Plains	0.26
552	4			6	5	6	7	6	6	1	3	3	3	4	1	1	4	2	0	1,2		1	3	7	59	55+	Eastern Plains	0.26
553	5		There would be more native animals around for people to see and would learn about	5	4	4	5	5	4	1	1	2	2	2	2	3	2	2	5	1,2,3	Bird	2	2	6	40	35-54	Eastern Plains	0.26
554	4			5	5	5	4	4	5	1	3	2	3	2	3	2	2	1	2	4		4	4	5	89	55+	Eastern Plains	0.26
555	4			1	1	1	1	1	1	1	1	3	3	2	4	1	1	1	0	4		2	3	7	51	35-54	Eastern Plains	0.26
556	4			2	3	3	5	3	1	1	1	3	1	1	1	1	1	2	0	1,2		4	4	2	56	55+	Eastern Plains	0.26
557	4			5	5	6	4	4	4	0	2	2	4	3	3	4	3	1	0	2		4	2	6	64	55+	Eastern Plains	0.26
558	7		They would create a balanced ecosystem- And I enjoy hearing coyotes howl, can‚Äôt imagine how beautiful the call of a distant wolf would be	5	5	5	5	1	3	1	4	4	4	4	2	1	4	2	2	3	Hamster	1	1	8	31	18-34	Eastern Plains	0.26
559	5		I think it would be neat to see them in the wild, also would help the local ecosystem	6	3	5	5	4	2	1	3	3	4	4	3	2	3	2	0	1		4	3	5	25	18-34	Eastern Plains	0.26
560	4			4	4	4	4	4	4	1	1	1	1	1	1	2	1	2	0	1		1	2	7	29	18-34	Eastern Plains	0.26
561	7		I love wolves, and would love to see more of them!	5	4	3	5	3	5	1	1	1	1	1	1	1	1	1	0	4		1	2	8	30	18-34	Eastern Plains	0.26
562	4			5	6	6	5	5	6	1	1	1	1	1	1	1	1	1	2	1		2	2	6	34	35-54	Eastern Plains	0.26
563	3	They may harm me or my family and pets		5	1	2	1	1	3	0	1	1	4	3	2	1	1	2	5	1		5	2	3	49	35-54	Eastern Plains	0.26
564	4			4	4	5	5	5	5	1	2	1	3	3	3	3	3	1	0	4		1	3	6	33	18-34	Eastern Plains	0.26
565	4			7	4	5	6	6	6	1	2	4	4	3	1	1	2	1	0	1		3	2	7	27	18-34	Eastern Plains	0.26
566	4			4	1	7	4	4	4	0	1	1	1	1	1	1	1	2	0	1,2,3		3	2	5	18	18-34	Eastern Plains	0.26
567	4			4	5	4	4	3	4	0	1	1	1	1	1	1	1	2	0	4		1	1	6	40	35-54	Eastern Plains	0.26
568	4			6	7	6	6	3	5	0	1	1	3	3	1	1	2	1	0	1		4	4	5	67	55+	Eastern Plains	0.26
569	6		A better eco system is good for all of us	7	7	7	7	7	5	1	1	1	3	4	3	2	4	1	0	1,2,3	Horses and chickens	4	5	8	49	35-54	Eastern Plains	0.26
570	6		i enjoy taking pictures of wildlife	6	5	5	6	6	2	1	2	2	3	4	4	4	3	2	1	1,2		4	2	7	51	35-54	Eastern Plains	0.26
571	5		Because it would positively impact the environment.	4	4	4	4	4	5	1	2	1	3	3	2	4	2	2	0	4		1	4	6	51	35-54	Eastern Plains	0.26
572	4			5	3	5	7	7	5	1	3	3	4	4	3	4	4	2	0	1,2,3	chickens	3	3	8	60	55+	Eastern Plains	0.26
573	4			5	5	5	6	4	4	1	2	2	1	2	1	1	1	1	0	3	bird	3	3	7	57	55+	Eastern Plains	0.26
574	3	They would more then likely attack humans		2	5	3	4	5	3	0	1	1	1	1	1	1	1	2	0	1,2		2	2	8	58	55+	Eastern Plains	0.26
575	4			4	5	4	4	5	3	1	1	1	1	1	1	1	1	2	0	1,2,3	Bearded dragons	3	3	7	60	55+	Eastern Plains	0.26
576	4			7	7	6	5	5	6	0	2	1	2	3	2	3	2	1	0	4		4	4	7	59	55+	Eastern Plains	0.26
577	3	We are a farming family, live on a farm, main source of income comes from farming. We have cattle. My husband hunts. All of these things are impacted by a wolf population.		5	6	7	7	7	6	1	2	2	2	2	1	4	2	2	2	1,2		5	5	8	40	35-54	Eastern Plains	0.26
578	5		don't know	5	4	4	5	5	5	1	1	1	1	1	1	1	1	2	0	1,2,3		2	3	6	61	55+	Eastern Plains	0.26
579	4			3	5	1	5	1	1	1	3	1	2	2	1	1	3	1	0	1		4	4	5	27	18-34	Western Slope	0.37
580	4			4	3	5	6	3	1	1	4	4	1	4	1	4	3	2	1	1,2		3	3	3	49	35-54	Western Slope	0.37
581	4			3	6	1	1	1	1	1	2	2	3	3	3	3	3	2	0	1		4	4	3	60	55+	Front Range	1.66
582	4			4	4	4	4	4	5	1	2	2	1	1	2	1	3	2	0	4		3	4	1	73	55+	Front Range	1.66
583	4			6	3	1	1	1	5	1	3	3	3	3	1	1	3	2	0	4		4	5	2	68	55+	Front Range	1.66
584	5		To see wolves once again in the wild would be a gift	4	3	6	7	7	4	1	2	1	1	2	2	3	3	2	0	1,3	Horses	4	3	8	65	55+	Western Slope	0.37
585	7		good choice	7	5	6	6	7	6	1	4	4	4	3	3	4	4	1	1	1,2		4	5	1	36	35-54	Front Range	1.66
586	4			5	3	5	5	2	1	1	1	2	2	2	1	1	2	2	0	4		3	4	1	67	55+	Front Range	1.66
587	4			4	5	6	7	5	3	1	3	3	1	3	2	1	3	2	0	1		3	5	5	63	55+	Front Range	1.66
588	5		better balance in the wildlife population	4	5	4	4	3	3	1	1	1	1	1	1	1	1	2	0	4		4	4	1	44	35-54	Front Range	1.66
589	4			6	3	1	3	1	3	1	4	4	4	4	3	2	4	2	0	1		4	5	8	57	55+	Front Range	1.66
590	4			2	2	2	2	1	1	1	2	2	1	2	2	1	2	1	2	4		3	4	1	40	35-54	Front Range	1.66
591	1	they kill all the game in any given area.		1	7	7	1	1	7	0	3	1	4	4	4	4	2	1	0	1		4	3	7	41	35-54	Western Slope	0.37
592	4			4	4	4	4	4	4	1	1	1	1	1	1	1	1	2	1	1		4	5	2	46	35-54	Front Range	1.66
593	4			6	7	6	5	4	7	1	3	2	2	3	2	2	1	1	0	4		5	4	3	71	55+	Front Range	1.66
594	4			7	7	7	7	7	7	1	1	1	3	3	1	1	2	1	0	4		3	5	1	73	55+	Front Range	1.66
595	4			5	6	4	4	4	5	1	1	1	1	1	1	1	1	1	0	4		3	3	1	65	55+	Front Range	1.66
596	4			6	2	5	5	4	1	1	4	4	2	2	2	3	4	2	0	2		2	5	1	67	55+	Front Range	1.66
597	4			5	5	5	5	5	5	1	2	2	2	2	2	2	2	2	0	4		4	4	7	43	35-54	Western Slope	0.37
598	4			5	6	6	1	7	5	1	3	1	4	4	4	4	3	1	0	1,2		3	2	4	58	55+	Front Range	1.66
599	4			5	3	5	6	5	3	1	2	2	2	2	1	1	2	2	0	1,3	Turtle	3	4	2	63	55+	Front Range	1.66
600	4			5	4	4	5	5	5	1	2	2	2	2	1	1	2	2	0	2		4	2	2	60	55+	Front Range	1.66
601	2	WOULD NOT WANT TO GO WALKING		6	6	6	6	6	6	1	4	3	2	1	2	3	4	2	NA	4		4	3	3	57	55+	Front Range	1.66
602	4			5	3	7	7	7	1	1	3	3	1	3	1	3	2	2	0	2		2	2	1	44	35-54	Front Range	1.66
603	4			5	4	4	4	4	4	0	4	4	3	4	3	4	4	1	0	1,2		5	4	5	69	55+	Front Range	1.66
604	7		Would love to be outdoors and perhaps have the opportunity to hear or see one!	5	2	7	7	7	3	1	4	4	1	1	1	1	4	2	0	4		4	4	1	53	35-54	Front Range	1.66
605	4			4	4	4	4	4	4	0	1	1	1	1	1	1	1	2	1	4		2	2	1	49	35-54	Front Range	1.66
606	4			6	1	1	7	1	1	1	4	4	4	4	1	1	4	2	0	1,2		3	4	4	59	55+	Front Range	1.66
607	7		grey wolves would help rodent control	7	7	7	7	7	7	1	2	2	4	4	2	2	2	1	0	2		3	4	5	67	55+	Front Range	1.66
608	1	They are wild animals, i love hiking and exploring. I would hate to run into a pack when I'm out with my family.		7	7	1	1	1	1	0	1	1	1	1	1	1	1	2	3	4		4	3	2	38	35-54	Front Range	1.66
609	7		Wolves are an important part of our ecosystem and the experience of seeing them in the wild is unlike any other.	1	1	1	1	1	1	1	4	4	1	1	1	1	4	2	0	1,2		6	3	2	49	35-54	Front Range	1.66
610	4			7	3	4	4	1	1	1	1	1	1	1	1	1	1	2	3	1		3	2	5	19	18-34	Front Range	1.66
611	4			6	6	4	5	5	4	1	2	2	3	4	1	1	1	1	0	4		4	3	3	78	55+	Front Range	1.66
612	4			5	4	4	5	3	4	1	4	4	1	2	1	1	4	2	0	4		6	5	5	73	55+	Front Range	1.66
613	4			4	6	4	4	4	1	1	4	4	1	3	1	1	4	2	0	4		4	5	4	82	55+	Front Range	1.66
614	6		Mainly referring to quality of life. Living in Colorado all of my life, I love and appreciate all of the wildlife that has been and are still here. Living in Colorado you have to share your space, as the wildlife shares theirs with people.	2	1	6	7	5	7	1	4	4	3	4	1	2	4	2	0	1		3	4	5	63	55+	Front Range	1.66
615	4			3	1	1	4	1	1	0	1	2	1	2	1	1	1	2	0	2		5	2	1	50	35-54	Front Range	1.66
616	4			3	3	7	7	7	1	1	4	3	2	2	3	2	2	2	0	1		4	3	8	70	55+	Front Range	1.66
617	4			5	5	5	6	3	5	1	3	2	1	1	1	1	3	1	0	4		5	2	2	21	18-34	Front Range	1.66
618	4			5	3	4	4	4	4	1	3	3	1	1	1	1	3	1	0	4		5	4	1	80	55+	Front Range	1.66
619	4			4	4	4	4	4	4	0	1	1	1	1	1	1	1	2	0	4		1	3	1	62	55+	Front Range	1.66
620	5		I feel, particularly in the urban areas, that the deer population has no natural predators. We need to have a better balance	5	7	7	7	7	7	1	3	2	3	4	4	4	2	2	0	1		4	3	4	65	55+	Front Range	1.66
621	6		I would try to see them in the wild, which would result in me getting out into nature more. Being in nature has been shown to have huge health benefits.	3	3	6	7	5	4	1	4	3	1	2	2	2	4	2	0	2		4	5	6	60	55+	Front Range	1.66
622	5		Not on my livelihood but on life...we live in midst of deer infested area	5	5	6	7	5	6	1	3	3	3	3	1	1	2	2	0	2		5	3	6	51	35-54	Western Slope	0.37
623	6		Wolves are part of the system and we need them for the economic system.	3	4	2	1	1	1	1	3	3	2	3	1	2	3	2	0	1		4	4	1	37	35-54	Front Range	1.66
624	3	I think I would be afraid to go hiking. I still would go hiking, but I would be nervous most of the time.		5	5	5	6	4	2	1	4	4	1	1	1	1	3	2	2	2		4	4	2	34	35-54	Front Range	1.66
625	2	Because their mean		6	7	6	6	4	5	1	3	3	3	3	3	3	2	1	0	4		2	2	2	29	18-34	Front Range	1.66
626	4			5	7	6	4	5	2	1	4	2	1	1	1	1	4	1	0	4		4	5	3	65	55+	Front Range	1.66
627	3	fear of hiking		7	7	7	7	1	6	0	2	1	1	4	2	1	2	1	0	4		6	5	1	66	55+	Front Range	1.66
628	7		it would be great to see them in their natural habitat	1	1	3	5	5	1	1	4	4	1	2	1	3	3	1	0	4		4	3	4	72	55+	Front Range	1.66
629	4			7	6	6	1	1	6	0	2	2	3	4	3	2	3	1	0	1		4	2	4	67	55+	Front Range	1.66
630	3	work for an agency that ultimately have to deal with managing wolves		7	7	1	1	1	7	0	4	1	2	4	4	4	2	1	0	4		5	4	4	50	35-54	Front Range	1.66
631	4			4	3	5	5	3	4	1	1	1	1	1	1	1	2	1	0	4		6	5	1	77	55+	Front Range	1.66
632	5		I believe bringing wolves back will relieve over grazing by elk & deer by culling their herds, this will improve vegetation and other species growth.	3	6	6	6	6	6	1	3	3	2	3	2	2	3	1	0	1		5	2	1	67	55+	Front Range	1.66
633	5		It would make people more hesitant to hunt or trespass in the wild and actually preserve the wildlands and forests	5	3	4	6	5	4	1	3	3	2	3	3	3	3	1	0	1,2		3	2	1	28	18-34	Front Range	1.66
634	4			4	3	4	4	7	6	1	3	3	1	1	1	1	3	1	0	4		5	5	2	52	35-54	Front Range	1.66
635	4			6	6	3	6	2	6	1	3	3	2	3	1	1	3	1	1	4		5	3	2	49	35-54	Front Range	1.66
636	4			5	5	2	3	1	4	1	1	1	3	4	1	1	1	1	0	1		4	5	1	65	55+	Front Range	1.66
637	5		They're beautiful creatures, would enhance life on the front range	6	6	6	5	6	4	1	4	4	3	4	2	2	3	1	1	3	fish	3	5	8	67	55+	Front Range	1.66
638	6		Wolves once were relatively abundant. They lived as part of an ecology that has changed and some of this change has negative consequences upon our life. Having wolves inhabit even a subset of their previous range would be a step in the right direction.	5	4	6	6	6	3	1	4	3	3	2	2	3	4	1	0	2		5	4	1	72	55+	Front Range	1.66
639	4			3	3	6	7	3	1	1	3	4	2	4	1	3	3	1	1	1,2		5	5	2	41	35-54	Front Range	1.66
640	4			5	6	7	4	6	5	1	2	4	1	2	2	3	4	1	2	4		3	2	1	34	35-54	Front Range	1.66
641	5		Because no animal should be made instinct by means of human behaviors and activities.	5	3	2	2	2	1	1	4	4	2	2	1	1	3	1	0	1		5	5	5	40	35-54	Western Slope	0.37
642	4			4	4	4	4	4	4	0	2	2	2	2	2	2	2	1	2	4		3	5	2	42	35-54	Front Range	1.66
643	5		I like the idea of returning wolves to Colorado.	6	7	6	6	6	7	1	1	1	3	2	3	3	2	1	0	2		5	4	4	47	35-54	Front Range	1.66
644	5		Wolves would reduce overly abundant deer populations that I worry about when driving. Also if we were able to see wolves infrequently in their habitat, it would make my family happy.	7	7	1	1	1	7	1	1	1	1	1	1	1	1	1	2	2		5	4	1	39	35-54	Front Range	1.66
645	4			2	2	3	2	2	2	1	2	2	1	1	3	3	3	1	1	1,2		4	4	7	30	18-34	Front Range	1.66
646	4			7	6	6	2	2	5	0	3	1	4	4	4	1	3	1	2	1		4	2	4	44	35-54	Front Range	1.66
647	4			5	5	5	6	3	5	1	1	1	1	2	2	1	1	1	2	1		4	4	2	39	35-54	Front Range	1.66
648	4			4	4	4	4	4	4	1	2	3	1	2	1	1	3	1	2	1		5	5	2	38	35-54	Front Range	1.66
649	4			1	5	6	5	5	3	1	1	2	1	1	1	1	1	1	0	1,2		2	2	1	30	18-34	Front Range	1.66
650	4			4	4	4	6	6	3	1	4	4	3	3	3	3	3	1	0	4		3	4	1	39	35-54	Front Range	1.66
651	2	They wouldn't have anything or any type of negative remarks on them due to the fact that if you leave them alone they leave you alone and that's how it is		4	4	4	4	4	4	1	2	2	1	1	1	1	1	1	4	3	Fish	1	3	1	27	18-34	Front Range	1.66
652	4			5	4	6	6	6	6	1	1	1	1	1	1	1	1	1	0	4		1	3	2	30	18-34	Front Range	1.66
653	4			6	6	6	6	6	2	1	3	3	2	4	1	1	3	1	0	1,2,3		5	5	6	52	35-54	Front Range	1.66
654	4			7	7	4	3	3	7	1	1	1	1	1	1	1	1	1	2	4		5	4	1	54	35-54	Front Range	1.66
655	6		Because they are an animal that needs to be protected and why not do it in colorado	6	6	7	6	6	4	1	3	3	1	3	1	3	3	1	0	1		3	3	2	36	35-54	Front Range	1.66
656	4			4	5	3	3	3	4	1	1	1	1	1	1	1	1	1	0	1		6	5	1	38	35-54	Front Range	1.66
657	3	I would be nervous in the woods.		4	4	1	5	5	5	1	2	2	1	1	1	1	2	1	0	4		1	2	8	33	18-34	Western Slope	0.37
658	5		Because communal energy. They had always lived here, and they should still be able to belong here. Restore the natural energy of the environment and it will have a positive impact on me	2	2	4	4	4	2	1	4	4	1	2	1	1	4	3	0	4		3	2	6	24	18-34	Western Slope	0.37
659	4			6	3	6	6	6	3	1	4	4	2	3	1	3	4	1	0			1	2	3	28	18-34	Western Slope	0.37
660	7		Wolves are a part of my culture so I feel a bond and close relationship to them.	5	6	6	2	1	3	1	4	2	3	3	2	2	3	1	0	1		3	2	1	26	18-34	Front Range	1.66
661	4			5	4	6	6	3	4	1	1	1	1	3	1	1	1	1	2	1,2		5	4	1	45	35-54	Front Range	1.66
662	4			5	3	6	6	1	4	1	1	2	1	3	1	1	1	1	0	4		5	4	1	53	35-54	Front Range	1.66
663	5		Wolves would help balance out nature	4	4	1	1	1	4	1	1	1	3	3	3	3	3	1	0	4		5	5	1	43	35-54	Front Range	1.66
664	5		na	4	1	1	1	1	1	1	1	1	1	1	1	1	1	1	3	1,2		6	4	4	50	35-54	Front Range	1.66
665	5		I think being able to see them once in awhile that would be great and I think having what is supposed to be in Colorado would be great.	3	2	5	6	4	6	1	3	1	1	1	1	1	1	1	0	1		5	5	3	36	35-54	Front Range	1.66
666	3	Increased fear of going into wilderness areas and parks		5	6	6	6	5	3	0	2	4	4	3	1	2	3	1	0	1		5	5	2	54	35-54	Front Range	1.66
667	4			4	3	5	6	3	6	1	2	1	1	3	1	3	1	1	0	4		4	4	5	43	35-54	Western Slope	0.37
668	4			4	5	4	3	3	4	1	1	1	3	2	1	1	1	1	2	3	Bird	4	2	5	52	35-54	Western Slope	0.37
669	3	Wolves would attack family and pets in rural Colorado.		7	7	7	1	4	7	0	4	2	4	1	4	2	1	1	0	1,2,3	Turtle	5	2	8	49	35-54	Western Slope	0.37
670	5		Love animals	5	5	5	6	5	3	1	3	3	4	2	3	1	2	1	0	4		3	4	5	49	35-54	Western Slope	0.37
671	3	Could attack people or livestock.		4	5	5	5	5	5	0	1	1	1	1	1	1	1	1	3	4		1	1	5	42	35-54	Eastern Plains	0.26
672	1	I don't think it would		5	1	1	1	1	3	1	4	4	4	4	3	4	4	1	2	1		4	4	2	29	18-34	Western Slope	0.37
673	4			5	5	5	6	5	5	1	2	2	2	2	2	2	2	1	0	2		2	3	8	45	35-54	Western Slope	0.37
674	5		Boost tourism/economy	5	6	4	4	4	5	1	2	3	4	4	4	4	3	1	0	4		2	1	7	31	18-34	Western Slope	0.37
675	2	I have cattle and hunt		5	7	7	1	7	7	0	3	2	4	4	4	4	3	NA	0	1,2		2	2	3	24	18-34	Western Slope	0.37
676	4			6	5	4	4	4	2	1	2	1	2	1	1	1	1	1	0	4		3	4	3	45	35-54	Western Slope	0.37
677	5		I‚Äôve never seen a Grey Wolf before so if I did see one while hiking or any outdoor activity it would be great	5	4	6	6	6	3	1	2	1	3	3	2	3	3	1	0	4		3	2	5	53	35-54	Western Slope	0.37
678	4			4	1	7	2	6	2	1	2	1	4	4	2	3	3	1	1	1		3	3	6	45	35-54	Eastern Plains	0.26
679	4			6	5	7	6	7	7	1	1	1	4	4	3	1	1	1	5	1,3	Bird	4	4	5	40	35-54	Western Slope	0.37
680	4			5	5	5	3	2	5	1	3	3	4	3	3	3	3	1	0	2		3	3	8	45	35-54	Western Slope	0.37
681	7		Its there natural home..its were they belong..	6	5	5	3	4	6	1	2	3	2	3	3	2	3	1	3	1,2		4	2	6	35	35-54	Western Slope	0.37
682	4			5	5	6	6	6	6	1	2	2	3	1	1	1	2	1	3	1,2		3	2	5	25	18-34	Western Slope	0.37
683	3	There would be a fear of wolf's when I go on a walk		5	4	6	2	5	3	1	2	3	3	2	2	1	3	1	1	1,2		3	2	6	20	18-34	Western Slope	0.37
684	4			3	7	5	5	3	4	1	1	1	3	1	4	4	1	1	1	1		3	3	6	42	35-54	Western Slope	0.37
685	2	They DO kill quite a bit of livestock up north. The govt will not pay fpr livestock because they say "it could have been killed by something else."		7	7	7	1	1	7	0	4	3	4	4	4	2	4	1	0	1,2,3	horses	4	4	7	38	35-54	Western Slope	0.37
686	4			5	5	5	5	5	5	1	4	4	1	3	1	1	4	1	0	2		4	2	5	53	35-54	Western Slope	0.37
687	6		They are beautiful plus my husky would protect me ;)	1	1	4	5	4	4	1	3	3	1	2	1	2	3	1	1	1,2		4	2	1	40	35-54	Western Slope	0.37
688	4			4	4	4	4	4	4	1	1	1	1	1	1	1	1	1	0	4		4	2	5	52	35-54	Western Slope	0.37
689	4			4	5	7	7	3	7	1	1	1	1	1	3	1	1	1	0	1,2		3	1	5	31	18-34	Western Slope	0.37
690	4			5	7	7	7	7	6	1	4	4	4	4	1	1	3	1	0	1		4	4	4	54	35-54	Western Slope	0.37
691	4			6	6	3	4	6	4	1	2	3	3	2	2	3	3	1	0	4		1	5	4	33	18-34	Western Slope	0.37
692	4			4	5	3	3	3	3	1	2	2	4	2	2	2	2	1	3	1,2,3	Ferret goat chicken duck	1	1	3	19	18-34	Western Slope	0.37
693	3	There's always a danger of a rogue wolf attack.		7	7	7	7	7	7	0	2	1	1	2	1	1	3	1	2	4		5	4	1	40	35-54	Front Range	1.66
694	4			5	6	4	5	2	4	1	2	3	1	2	1	1	2	1	0	2		5	5	1	35	35-54	Front Range	1.66
695	4			6	6	3	6	1	3	1	1	1	1	1	1	1	1	1	2	1		5	4	3	41	35-54	Front Range	1.66
696	4			1	1	1	1	1	1	1	4	4	3	3	1	1	4	1	2	1,2,3		4	2	2	45	35-54	Front Range	1.66
697	4			6	4	2	2	1	1	0	1	1	1	3	1	1	1	1	0	4		5	4	2	54	35-54	Front Range	1.66
698	4			3	6	5	5	5	6	1	1	1	1	1	1	1	1	1	4	4		5	5	1	41	35-54	Front Range	1.66
699	4			5	6	4	4	4	5	0	1	1	1	2	2	2	1	1	0	2		5	2	1	53	35-54	Front Range	1.66
700	7		because they are one of the animals that most respect their place in the ecosystem	6	3	6	5	5	6	1	4	4	4	4	3	3	4	1	3	1		5	4	1	38	35-54	Front Range	1.66
701	4			5	5	6	1	3	7	1	2	2	2	3	2	3	2	1	2	1		5	3	5	52	35-54	Front Range	1.66
702	4			5	4	6	5	5	3	1	3	3	2	3	1	1	2	1	2	1,3	Turtle	5	4	1	47	35-54	Front Range	1.66
703	4			5	6	6	6	6	7	1	4	4	4	1	4	1	4	1	0	1		5	3	1	39	35-54	Front Range	1.66
704	4			4	4	4	4	4	4	1	2	2	1	1	1	1	2	1	0	1,2		4	5	1	47	35-54	Front Range	1.66
705	4			6	4	4	2	2	6	1	1	1	1	2	1	1	1	1	2	1		4	4	1	52	35-54	Front Range	1.66
706	5		Heighten my appreciation of wilderness knowing there are wolves there	6	6	6	7	6	6	1	3	2	3	4	2	4	3	1	0	4		5	4	1	52	35-54	Front Range	1.66
707	5		Bring an animal back from the past	4	3	2	1	4	6	1	3	3	4	3	4	2	2	1	1	4		5	5	1	49	35-54	Front Range	1.66
708	4			6	6	6	6	6	6	1	2	2	1	2	1	1	2	1	2	1		NA	5	1	49	35-54	Front Range	1.66
709	4			5	3	5	5	5	3	1	2	2	2	2	1	1	2	1	2	1		5	2	1	39	35-54	Front Range	1.66
710	4			4	4	4	4	4	4	1	1	1	1	1	1	1	1	1	1	2		1	2	1	43	35-54	Front Range	1.66
711	4			5	5	7	6	6	5	1	1	1	1	2	1	1	2	1	3	4		5	4	5	46	35-54	Front Range	1.66
712	4			4	2	5	5	5	1	1	1	1	1	1	1	1	1	1	0	2		3	2	2	39	35-54	Front Range	1.66
713	7		Life would be back to the way God intended	1	1	5	6	5	4	1	4	4	4	4	2	3	3	1	3	4		2	1	2	41	35-54	Front Range	1.66
714	7		Would get pleasure from seeing wolves move through the plains and mountains of colorado	6	1	7	7	7	1	1	3	4	1	1	1	1	3	1	2	1,2		5	5	3	49	35-54	Front Range	1.66
715	5		They are such a neat, powerful, and beautiful animal. My spouse and son love Wolves and their happiness would make me happy	4	5	5	4	4	5	1	1	1	2	1	1	1	1	1	3	1		4	3	4	36	35-54	Front Range	1.66
716	4			5	5	6	4	5	5	1	3	3	3	3	3	3	3	1	3	1		5	3	3	41	35-54	Front Range	1.66
717	4			5	7	4	3	3	4	0	1	1	1	1	1	1	2	1	0	1		4	4	2	52	35-54	Front Range	1.66
718	6		Knowing that the ecosystem is almost intact is important	5	6	7	2	5	7	1	4	1	2	1	4	2	4	1	0	4		4	4	2	49	35-54	Front Range	1.66
719	6		I like the outdoors and the chance to see wolves or benefit from the effectc they have on the outdoors would cause me to partake in outdoor activity even more	5	5	5	6	6	3	1	4	4	3	3	3	3	4	1	3	1,3	horse	5	5	8	48	35-54	Front Range	1.66
720	4			3	5	4	5	2	3	1	2	1	1	3	1	1	3	1	1	1,3	Chickens	5	5	8	51	35-54	Front Range	1.66
721	4			5	5	2	3	4	7	1	2	2	2	2	3	1	2	1	0	1,2,3	Fish	6	2	1	43	35-54	Front Range	1.66
722	4			5	5	6	6	5	3	1	2	1	1	2	1	1	2	1	0	2		5	5	3	52	35-54	Front Range	1.66
723	5		It would increase tourism and put Colorado in good news for being responsible to correcting a environmental wrong.	5	5	5	6	5	3	1	2	4	4	3	1	1	2	1	0	2		5	3	1	54	35-54	Front Range	1.66
724	4			5	6	5	5	6	7	0	2	1	4	4	3	3	1	1	3	1		5	4	2	43	35-54	Front Range	1.66
725	4			7	5	6	2	5	5	1	3	3	2	3	3	1	3	1	2	1		5	4	2	37	35-54	Front Range	1.66
726	3	No comment.		5	4	5	3	1	5	0	3	2	2	3	2	3	3	1	3	4		5	4	6	41	35-54	Front Range	1.66
727	6		I would go to the mtn more often	5	3	5	6	5	6	1	4	4	4	3	1	3	4	1	0	1		2	3	4	54	35-54	Front Range	1.66
728	4			6	7	6	6	6	3	1	1	1	1	1	1	1	2	1	0	1		5	5	1	42	35-54	Front Range	1.66
729	4			3	3	3	5	3	5	1	1	1	1	1	1	3	2	1	2	4		5	5	3	47	35-54	Front Range	1.66
730	4			5	5	2	2	2	6	1	3	1	4	4	4	3	2	1	2	1,2,3	Turtle	5	3	3	51	35-54	Front Range	1.66
731	6		Because I could see them flourish in the Colorado wilderness	5	5	5	6	7	7	1	4	4	4	4	4	2	2	1	1	1		3	2	3	40	35-54	Front Range	1.66
732	5		I want to see wolf packs in Rocky Mountain National Park	2	5	3	3	3	7	1	3	2	1	3	2	3	3	1	0	2		3	2	1	44	35-54	Front Range	1.66
733	7		The effect wolves would have on the ecosystem would restart our environment and decrease global warming.	5	1	5	1	1	3	1	3	2	4	3	2	1	3	1	5	1		4	4	2	37	35-54	Front Range	1.66
734	6		they wouldn't	7	7	5	6	6	6	1	2	1	3	4	4	3	2	1	0	4		4	3	2	51	35-54	Front Range	1.66
